# 1 3d virtual histology reveals 2 pathological alterations of cerebellar 3 granule cells in multiple sclerosis

4 Jakob Frost<sup>1</sup>, Bernhard Schmitzer<sup>2</sup>, Mareike Töpperwien<sup>1,5</sup>, Marina Eckermann<sup>1,5</sup>,  
5 Jonas Franz<sup>3</sup>, Christine Stadelmann<sup>3,4</sup>, Tim Salditt<sup>1,4\*</sup>

\*For correspondence:  
[tsalditt@gwdg.de](mailto:tsalditt@gwdg.de) (TS)

6 <sup>1</sup>Institut für Röntgenphysik, Georg-August-Universität Göttingen, Germany; <sup>2</sup>Institute of  
7 Computer Science, Georg-August-Universität Göttingen, Germany; <sup>3</sup>Institut für  
8 Neuropathologie, Universitätsmedizin Göttingen, Germany; <sup>4</sup>Cluster of Excellence  
9 'Multiscale Bioimaging: from Molecular Machines to Networks of Excitable Cells'  
10 (MBExC), Georg-August-Universität Göttingen, Germany; <sup>5</sup>Present address: (M.E.) ESRF,  
11 Grenoble, France; (M.T.) XYLON GmbH, Hamburg, Germany

12  
13 **Abstract** We investigate structural properties of neurons in the granular layer of human  
14 cerebellum with respect to their involvement in multiple sclerosis (MS). To this end we analyze  
15 data recorded by X-ray phase contrast tomography from tissue samples collected post mortem  
16 from a MS and a healthy control group. Using automated segmentation and histogram analysis  
17 based on optimal transport theory (OT) we find that the distributions representing nuclear  
18 structure in the granular layer move to a more compact nuclear state, i.e. smaller, denser and  
19 more heterogeneous nuclei in MS. We have previously made a similar observation for neurons of  
20 the dentate gyrus in Alzheimer's disease, suggesting that more compact structure of neuronal  
21 nuclei which we attributed to increased levels of heterochromatin, may possibly represent a  
22 more general phenomenon of cellular senescence associated with neurodegeneration.

## 24 Introduction

25 The complex cytoarchitecture of the human brain can undergo pathological alterations associated  
26 with neurodegenerative diseases. Morphological changes may range from drastic and relatively  
27 easy to be diagnosed to – on the contrary – very subtle and yet elusive changes. Deciphering  
28 the interplay between the neuronal tissue structure and the development of neurodegenerative  
29 diseases therefore remains a challenge which requires further progress in imaging and morpho-  
30 metric quantification. Today, histology and histopathology is largely based on tissue sections and  
31 observation of exemplary regions in two-dimensions (2d) by optical or electron microscopy. Three-  
32 dimensional (3d) imaging is required to digitalize and compare structures in their full dimensional-  
33 ity. Serial sectioning, staining, digital microscopy and subsequent alignment is laborious, but can  
34 in principle address micro-anatomy and cytoarchitecture in 3d. Unfortunately, this comes at the  
35 cost of a non-isotropic resolution, possible artifacts due to the slicing, staining, or the alignment  
36 procedure. Moreover, this approach is severely limited in throughput, and therefore often impedes  
37 the visualization of large fields of view (FOV), even at moderate resolution, as well as the compari-  
38 son between a sufficient number of individuals. Sufficient sample size and volume, in combination  
39 with unsupervised morphometric quantification, however, is a prerequisite to understand the lim-  
40 its of 'structural homeostasis' and the onset of pathological structural alterations. X-ray phase

41 contrast computed tomography (XPCT) has been recently introduced as a new 3d imaging method  
42 for histology and pathohistology *Albers et al. (2018)*; *Massimi et al. (2020)*; *Vågberg et al. (2018)*;  
43 *Reichardt et al. (2021)*; *Frohn et al. (2020)*; *Dejea et al. (2019)*; *Khimchenko et al. (2016)*. It offers  
44 a capability for high resolution imaging of soft tissues over a cross section of several mm, with a  
45 geometric zoom able to visualize selected regions of interest down to 20 nm to 50 nm voxel sizes  
46 *Bosch et al. (2022)*; *Kuan et al. (2020)*. In this way, 3d reconstructions of neurons and their spatial  
47 organization within particular regions can be obtained. By comparison of different cohorts, mor-  
48 phometrical analysis may also contribute to an understanding of neurodegenerative mechanisms,  
49 in particular if tissue structure is probed at subcellular resolution.

50 A case in point is cerebellar involvement in multiple sclerosis (MS), which is relevant for MS-related  
51 impairments, including not only cerebellar motor dysfunction but also cognitive cerebellum associ-  
52 ated deficits *Weier et al. (2015)*; *Kutzelnigg et al. (2007)*; *Parmar et al. (2018)*. More generally, as MS  
53 research is no longer restricted to inflammation and demyelination as major pathological mecha-  
54 nisms, but also includes neurodegenerative processes *Albert et al. (2017)*, it is timely to address  
55 the cerebellar cytoarchitecture in a broader sense. As one of the oldest brain regions of mammals,  
56 the cerebellum is well known for its role in motion control and synergy of movements *Manto et al.*  
57 *(2013)*. Despite a relatively small weight of ~ 10% of the total brain mass, the cerebellum contains  
58 80% of the total number of neurons within the human brain *Azevedo et al. (2009)*. Tightly packed  
59 neurons in its densest layer, the so-called granular layer, are a particular target when screening  
60 for possible MS-related changes in the cytoarchitecture. Along with the molecular layer and the  
61 interfacial Purkinje cell layer, the granular layer is part of the tightly folded cerebellar cortex.

62 In a preceding study, we provided 3d imaging of tissue samples from human cerebellum, collected  
63 post mortem by autopsy *Töpperwien et al. (2018)*. The millimeter sized samples were taken by  
64 biopsy punches from formalin-fixed and paraffin-embedded (FFPE) tissue blocks, and scanned by  
65 XPCT. Phase contrast was achieved based on propagation of partially coherent wavefields, using  
66 both synchrotron radiation for high resolution and custom  $\mu$ -CT scanners for larger overviews.  
67 Datasets with subcellular resolution were obtained, and a reconstruction workflow to automatically  
68 locate the neuronal nuclei in the molecular and granular layer by an automated approach based on  
69 the Hough transform, giving a detailed statistical account of the spatial packing of neurons within  
70 the granular layer (cf. Fig. 1d). Based on local density estimations and pair correlation functions,  
71 a previously unknown anisotropy in the short-range order of granule cells was reported, which  
72 reflected the plane of the dendritic trees of the Purkinje cells.

73 In this work, we extend the previous analysis from physiological histology to the pathohistology  
74 of MS. To this end, we use the data provided in *Töpperwien et al. (2018)* and investigate possible  
75 alterations in the granular layer occurring in the tissue of 6 MS patients compared to samples from  
76 6 control subjects. Since data acquisition and tomographic reconstruction was already reported in  
77 detail *Töpperwien et al. (2018)*; *Töpperwien (2018)*, we concentrate here on pathological structural  
78 alterations of cerebellar granule cells. Note that previously only neuron locations, but no struc-  
79 tural features of neurons were obtained in the segmentation. Here we can now provide a detailed  
80 comparison of structural features of neuronal nuclei, since progress in segmentation allowed us  
81 to extract not only positions of nuclei, but also size, shape, and electron density, as well as hetero-  
82 geneity of the density within the nucleus. Furthermore, we now have novel statistical tools at hand,  
83 based on optimal transport (OT) theory *Santambrogio (2015)*; *Peyré and Cuturi (2019)*, with which  
84 the structural differences in the cytoarchitecture can be compared, even without prior structural  
85 hypothesis and group attribution. The fact that we earlier found clear changes in dentate gyrus  
86 granule cells associated with Alzheimer's disease (AD) *Eckermann et al. (2021)*, also motivated us  
87 to reinvestigate the cerebellum data, in view of possible involvement of cerebellar granule cells in  
88 MS.

89 The manuscript is organized as follows: after this introduction, the results section first describes  
90 the available data and the segmentation of neuronal nuclei, before we analyze neuronal density  
91 and packing, and then nuclear morphological features. The multidimensional histograms repre-

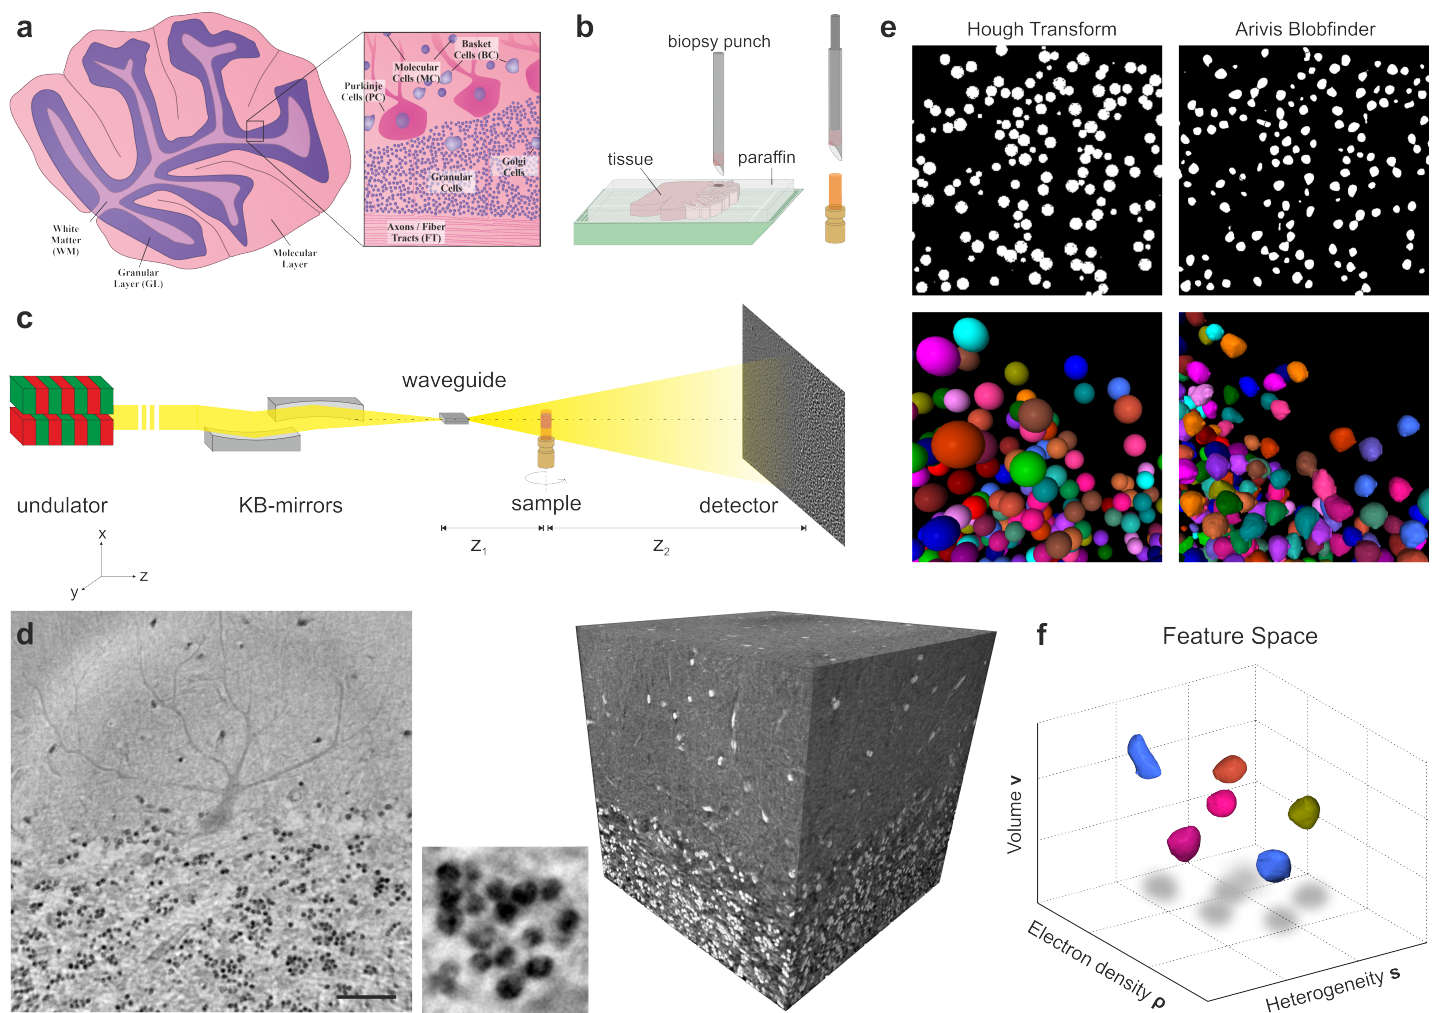

**Figure 1.** Experimental setup and analysis workflow. **(a)** Sketch of the human cerebellum in transversal slice and zoom-in to the cerebellar cortex, which contains various types of cells. **(b)** Tissue samples of the cerebellum were taken post mortem from twelve individuals (6 MS, 6 Control) and embedded in paraffin. Biopsy punches of the samples were placed into a Kapton tube for scanning. **(c)** Schematic of the synchrotron setup at the PETRAIII storage ring (DESY, Hamburg). X-rays with an energy of 13.8 keV are generated, focused and hit an intensity detector behind the sample. From the projections, the sample is reconstructed using phase retrieval. **(d)** The reconstructed volume covers the interface between the molecular- and the granular layer (right, inverted contrast). A virtual slice through the volume reveals histological features such as the granule cell nuclei or the dendritic tree of a Purkinje cell (left). Scale bar: 50  $\mu\text{m}$ . Also the internal structure of the nuclei can be resolved (middle). **(e)** In the previous work of [Töpperwien et al. \(2018\)](#) the data were segmented with the Hough transform, which is suited to find center positions of the GC-nuclei and generates spherical objects (left). Here, we segment the nuclei with the Blob Finder algorithm from Arivis, which generates segments covering the actual shape of the nuclei (right). This enables to determine structural features of the nuclei such as their volume or sphericity. Note that the 3d views in (e) left/right do not correspond to the same location. **(f)** The nuclei are then represented in a feature space – an abstract space in which each nucleus represents a point with coordinates encoding their structural properties. Each subject is represented by a point cloud, with is then further analyzed in view of pathological alterations.

92 sending the neuron population of any single subject are then further compared between individu-  
 93 als of the MS and control groups, using concepts of OT theory. The paper closes with a discussion  
 94 and summary of the main morphometric results. Technical details are presented in the Materials  
 95 and Methods section in summarized form, and in part further explained in the appendix.

## 96 Results

97 Figure 1 presents (a) a schematic of the granular layer as the target region of this work, and (b) the  
 98 sample extraction from a tissue block, which is chosen to probe the granular layer of the cerebellar  
 99 cortex, consisting of the molecular layer, the granular layer and the Purkinje cell layer at the inter-

100 face of the latter. In (c), the XPCT data acquisition scheme is depicted, followed by (d) an example  
101 illustrating the data quality, (e) a comparison of two different segmentation methods, and finally (f)  
102 a schematic of the so-called feature space consisting of point clouds, in which the coordinates of  
103 each point represents features of corresponding nuclei, which then subjected to further analysis.

## 104 Data

105 Tissue samples were acquired from a total of twelve age-matched subjects: six patients suffering  
106 from multiple sclerosis (MS), and six healthy control subjects (Control, CTRL). The samples were  
107 collected post mortem, chemically fixed and embedded in paraffin. Using biopsy needles, cylin-  
108 drical tissue samples were punched out of the paraffin-embedded tissue blocks, and placed in a  
109 polyimide (Kapton) tube, as depicted in Fig. 1(b). The samples were scanned at the GINIX endsta-  
110 tion *Salditt et al. (2015)* of the P10 beamline of the PETRAIII storage ring (DESY, Hamburg), see  
111 the schematic of the experimental setup in Fig. 1(c). The monochromatic (Si(111) channel-cut  
112 monochromator) undulator beam of 13.8 keV photon energy was prefocused by a pair of Kirkpatrick-  
113 Baez (KB) mirrors and coupled into an X-ray waveguide serving further spot size reduction and co-  
114 herence filtering. Using this scheme, the samples which are positioned on the fully motorized to-  
115 mographic stage are illuminated by a fully coherent beam with reduced wavefront artefacts which  
116 facilitates a clean and artifact poor image formation. Projected in-line holograms are recorded on  
117 a fibre-coupled detector. Projection images are first treated by phase retrieval using a Contrast-  
118 transfer function (CTF)-based algorithm *Cloetens et al. (1999)* implemented in a published soft-  
119 ware package *Lohse et al. (2020)* prior to tomographic reconstruction. Detailed information about  
120 data acquisition and the experimental setup can be found in *Töpperwien et al. (2018)*. The recon-  
121 structed samples have a field of view (FOV) of  $336 \times 336 \times 375 \mu\text{m}^3$  and capture the transition from  
122 the molecular to the granular layer. The voxel size of 187 nm is sufficient to identify various his-  
123 tological characteristics such as blood vessels, the dendritic tree of a Purkinje cell as well as the  
124 nuclei of the granule cells, when observing a virtual slice through the volume (see e.g. Fig.1(d) left).  
125 Furthermore, the internal structure of the nuclei is resolved. Note that gray values in XPCT repre-  
126 sent phase shifts of the X-ray beam which are proportional to the electron density difference with  
127 respect to the average sample, here predominantly the paraffin mounting medium. In *Töpperwien*  
128 *et al. (2018)* the granule cell nuclei were already segmented using the spherical Hough transform  
129 *Peng et al. (2007)*. The Hough transform finds the center positions of spherical objects and gen-  
130 erates spheres of equal size. Contrarily, here we are interested in the details of nuclear volumes,  
131 shapes, and electron density distribution. To this end, the nuclei are segmented with the Blob  
132 Finder algorithm of the software Arivis (Zeiss AG, Germany). The Blob Finder generates segments  
133 which cover the actual shape of the nuclei, in contrast to the Hough transform which only gives  
134 the center positions of the nuclei. Here we can hence exploit detail structural properties related to  
135 the size, roundness and the density of the nuclei, as illustrated in Fig.1(e). We use this information  
136 to place each neuron in a *feature space*, with coordinates representing the corresponding struc-  
137 tural property, as schematically illustrated in Fig.1(f) and previously introduced in *Eckermann et al.*  
138 *(2021)*. In this way, one obtains a multidimensional distribution (histogram) for each subject. Anal-  
139 ysis of the entire distributions and OT based metrics then allows us to probe differences between  
140 individuals on the histogram level, instead of only the mean or median values. Most notably, we  
141 can compare data beyond the capacity limits and bias of visual inspection.

## 142 Segmentation

143 The segmentation was performed using the software Arivis Vision4D (Zeiss AG, Germany). Several  
144 ten thousand neurons were detected in a semiautomatic workflow for each sample. The segments  
145 were created with the Blob Finder algorithm which is designed to find round, sphere-like objects.  
146 It has several adjustable parameters with which size and number of found objects can be varied.  
147 Note that all samples were segmented with the same parameters in order to make the results  
148 comparable. Since we focus on the analysis of the granule cell nuclei, all objects found by the



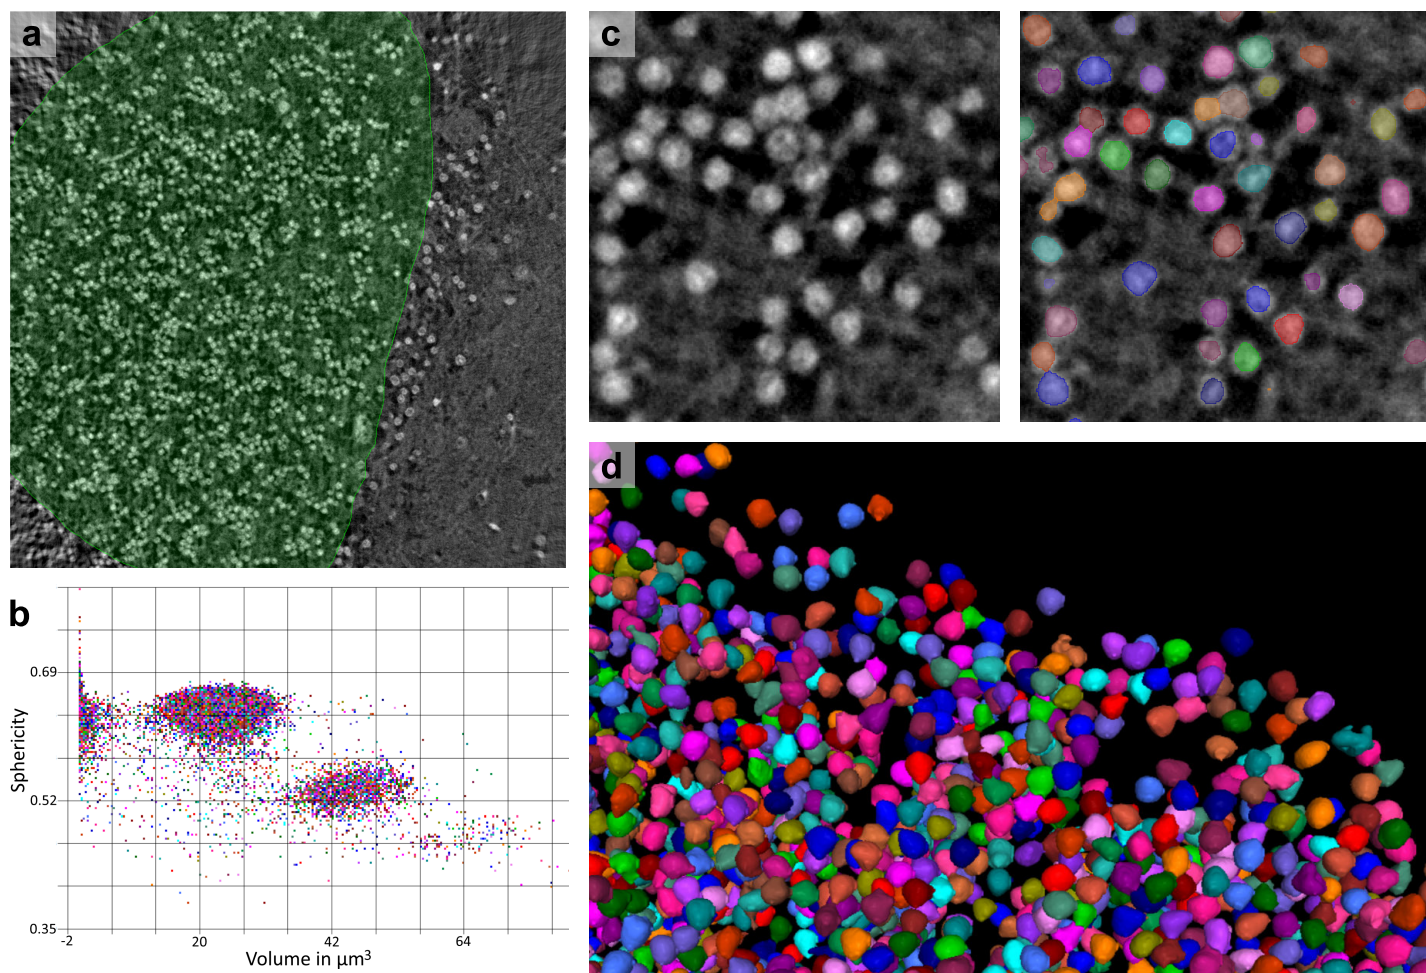

**Figure 2.** Segmentation of the granule cell nuclei. **(a)** A mask enclosing the granule layer is used to remove segments lying in the molecular layer and Purkinje cell layer as well as artifacts in the corner of the samples. **(b)** Plotting the properties volume and sphericity of all segments in a scatterplot allows the segments to be distinguished into three subgroups: granule cells (middle), double cells (bottom right) and artifacts (left). The artifacts are filtered out, and the double cell segments are split into single cell segments **(c)** The final segmentation results shown in a 2d slice. Different segment colors serve for better distinction. **(d)** Three-dimensional rendering of the segments reveals a homogeneous distribution of round spheres, which adequately represent the granule cell nuclei.

149 Blob Finder outside the granular layer were vetoed out. For this purpose, a mask was created  
150 which only encloses the granular layer. The mask was defined by manual drawing in the data,  
151 see Fig.2(a). All objects outside the mask are removed. Furthermore, several filters were applied  
152 to remove segments which clearly do not represent granule cell nuclei. For detailed information  
153 about the filter limits and the general segmentation workflow, see Appendix 1. The limits of the  
154 filters were determined by plotting all segments in a scatter plot, see Fig. 2(b). In the scatter plot, all  
155 segments are plotted as single points according to their properties like volume or sphericity. In this  
156 representation, three subgroups of segments can be identified. The middle of the three groups are  
157 identified as the granule cells. The left group are small artifact segments which are filtered out by a  
158 volume filter of  $\approx 10 \mu\text{m}^3$ . The right group corresponds to “double cells”, which occur when two cells  
159 are close to each other and are covered by only one segment. To ensure that each cell is covered  
160 by exactly one segment, the double cell segments can be separated with the splitting operation of  
161 Arivis. This operation applies a distance map on the segments, whose local maxima are then used  
162 as seed points for a Watershed-algorithm. Figure 2(c,d) show the final segmentation results after  
163 filtering. A homogeneous distribution of round segments is obtained, which adequately covers the  
164 granule cell nuclei. From the segments the following properties are extracted: the center of mass,

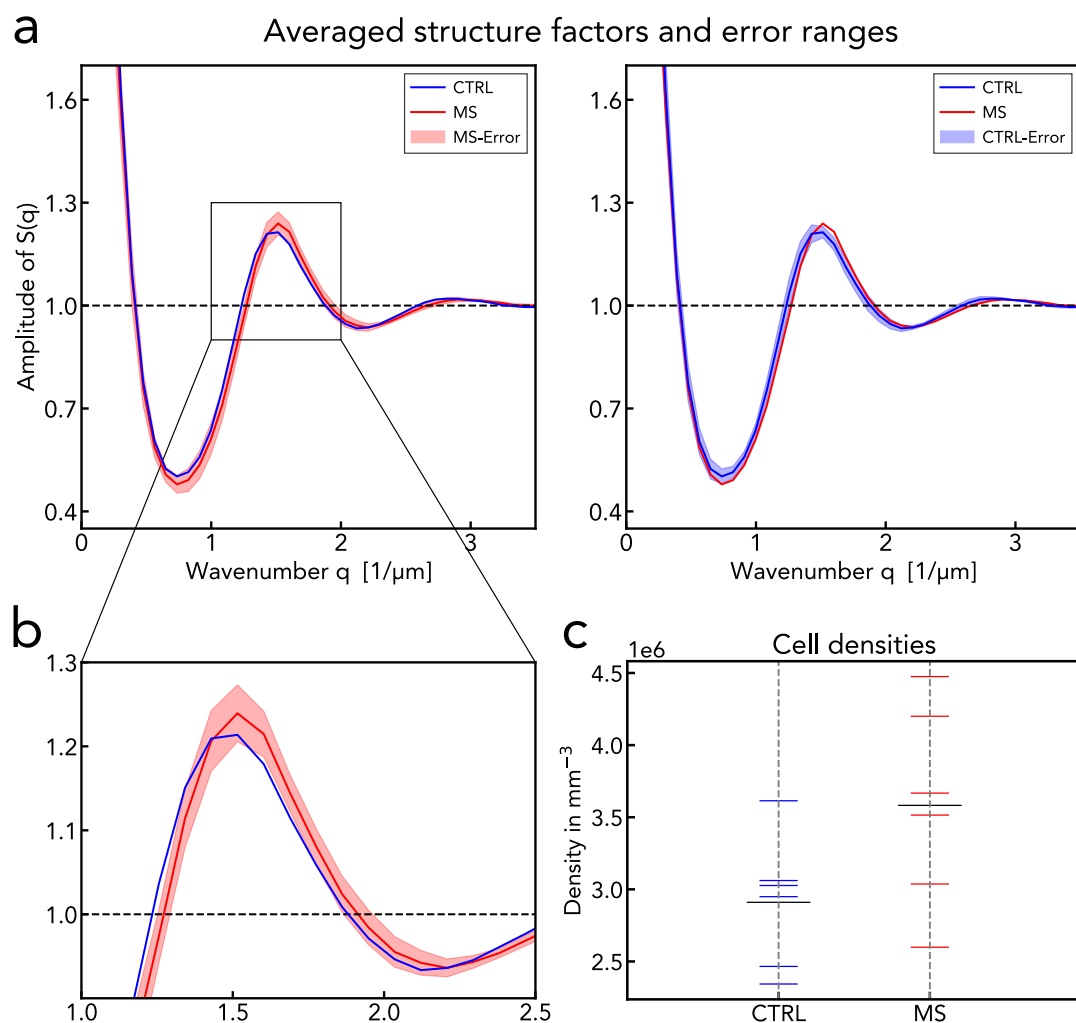

**Figure 3.** Structure factor characterizing spatial arrangement of the nuclei. **(a)** The group averages of the powder-averaged structure factor, with the error intervals (standard error of the mean  $\sigma_{\bar{x}}(q)$ ) (left) of the MS-group (left) and (right) the CTRL-group. **(b)** A zoom-in showing the MS group-averaged structure factor to be located at the boundary of the error interval of the CTRL group, and vice versa, which is quantified by  $\chi$  values of 1.04 and 1.58, respectively. **(c)** The cell density of all individuals plotted with the mean density of both groups. t-test on the density values yields  $p = 0.091$ .

165 volume, sphericity, mean of electron density and standard deviation of electron density. The latter  
 166 is dominated not by white shot noise of the reconstructed gray values, but by the density variations  
 167 representing nuclear sub-structure. We denote this variation as *heterogeneity* of the nucleus.

### 168 Density and local ordering of granule cells

With the center positions of the nuclei obtained from the segmentation, the density of the granule cells within the granular layer is calculated for each subject. To this end, the volume of the granule layer is computed by creating an envelope around all cells. The total cell count divided gives the average cell density, which is plotted for all subjects in Fig. 3c. For the MS group, the average  $\bar{\rho}_n = 3.59 \times 10^6 \text{ 1/mm}^3$  is higher than for Control subjects with  $\bar{\rho}_n = 2.99 \times 10^6 \text{ 1/mm}^3$ , with marginal statistical significance of  $p = 0.091$  (Welch's t-test, double-sided). The short range order of the cells can be further investigated by calculating the structure factor  $S(\mathbf{q})$  for each sample, using concepts of quantifying ordering in amorphous and liquid structures of condensed matter, which we had already used for neurons in *Töpperwien et al. (2018)*. The structure factor is calculated based on

the nuclei center positions  $\mathbf{r}$  according to

$$S(\mathbf{q}) = \frac{1}{N} \sum_{j=1}^N \sum_{k=1}^N e^{-i\mathbf{q} \cdot (\mathbf{r}_j - \mathbf{r}_k)}, \quad (1)$$

169 where  $N$  denotes the number of nuclei and  $\mathbf{q}$  the reciprocal space vector. A 3d structure factor  $S(\mathbf{q})$   
 170 is obtained for each subject, which was investigated in view of directional anisotropy already in  
 171 **Töpperwien et al. (2018)**. Here, we focus on the comparison between MS and CTRL and to this end  
 172 content ourselves with the 1d (powder averaged)  $S(q)$ , which can be compared more easily already  
 173 based on visual inspection. Figure 3a shows the group-averaged  $S(q)$  curves, representing a mean  
 174 structure factor for MS and one for CTRL. Two strong modulations of the curves show that the  
 175 neurons exhibit pronounced short range order. The peak of the MS curve is slightly shifted towards  
 176 the higher wave numbers in comparison to  $S_{\text{CTRL}}(q)$ , which indicates a more compact arrangement  
 177 in MS and is in agreement with the higher cell densities. To determine whether the observed  
 178 shift is statistically significant, we test whether the graphs lie within each other's error interval. As  
 179 error interval, the standard error of the mean  $\sigma_{\bar{x}}(q)$  is chosen. At every point  $q$  where the structure  
 180 factors are sampled, the squared ratio  $\chi^2$  of the distance between the graphs and the error  $\sigma_{\bar{x}}(q)$   
 181 is calculated and averaged over all  $q$  as

$$\chi^2 = \frac{1}{n} \sum_{q=1}^n \frac{(S_{\text{MS}}(q) - S_{\text{CTRL}}(q))^2}{\sigma_{\bar{x}}(q)^2}. \quad (2)$$

182 Since the powder-averaged structure factors are noisy for very high and very small  $q$  values, this is  
 183 done only in the range  $0.3 \mu\text{m} < q < 5 \mu\text{m}$  ( $5 \mu\text{m}$  is the sampling limit of the 3d structure factors). Note  
 184 that two  $\chi^2$  values are obtained, since we can compare the distance once with the error of MS and  
 185 once with that of CTRL, resulting in  $\chi^2 = 1.04$  and  $\chi^2 = 1.58$  respectively. This would indicate that the  
 186 differences are not statistically significant, and that more samples are required to unravel possible  
 187 inter-group effects from the inter-subject variance. In fact, when inspecting the residuals and the  
 188 systematic changes in the curve, one may very well be tempted to reject the null hypothesis.

### 189 **Creating the feature space**

190 After the granule cell nuclei are segmented and several properties have been extracted, we next in-  
 191 vestigate whether the structural properties of the nuclei (as opposed to their spatial arrangement  
 192 and ordering treated above) exhibit significant systematic changes associated with MS pathology.  
 193 To this end, we have created a workflow in which the nuclei are characterized by several quan-  
 194 tifiable properties, which we denote as features. Accordingly, each segmented nucleus can be  
 195 considered as a point in a so-called "feature space". The coordinates of the point are given by the  
 196 respective feature values, where each dimension corresponds to one feature. For every subject,  
 197 the population of all granule nuclei then forms a point cloud in this feature space. The point cloud  
 198 can be thought as a sum of Dirac masses with uniform weights  $\mu = \frac{1}{N_{\mu}} \sum_{i=1}^{N_{\mu}} \delta_{x_i}$ . Thus, one receives  
 199 a multidimensional discrete distribution, which represents an individual by the properties of its  
 200 nuclei. The following six features were chosen for the analysis:

- 201 • volume  $v$
- 202 • sphericity  $\varphi$
- 203 • mean of electron density  $\rho$
- 204 • heterogeneity  $s$
- 205 • number of neighbors within local vicinity  $nm$
- 206 • distance to nearest neighbor  $d_{nm}$

207 The heterogeneity describes the standard deviation of the electron density within the nucleus,  
 208 given by  $s = \sqrt{\frac{1}{N-1} \sum_{i=1}^N (\bar{x} - x_i)^2}$  where  $x_i$  are the gray values ( $\hat{=}$  electron density) of the voxels  
 209 enclosed by a segment. The number of neighbors  $nm$  is given by the number of cells located within

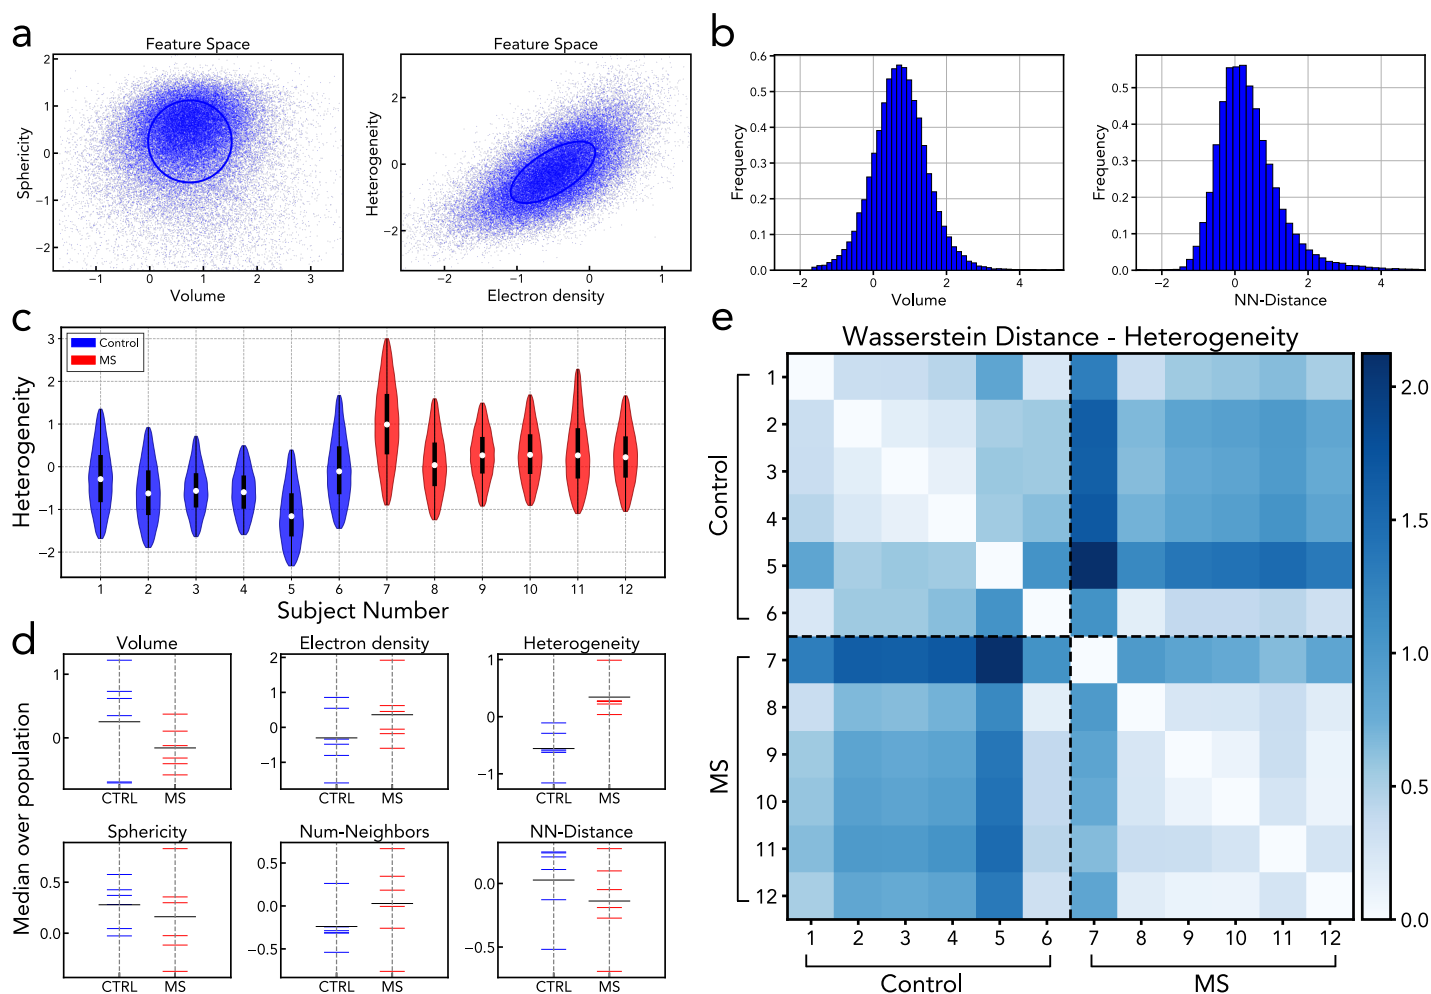

**Figure 4.** Features space and individual feature analysis. **(a)** From the segmented nuclei, a feature space is constructed in which individuals are represented by the features of their nuclei. The figure shows 2d projections of the 6d feature space, example shown for one subject. Single points refer to granule cell nuclei, a whole point cloud to one subject. **(b)** Histograms of single nuclei feature plotted, example shown for one subject, revealing all features are approximately Gaussian distributed. **(c)** Violin plot of the heterogeneity for all subjects. **(d)** Median values of all subjects and each feature. A significant difference between controls and MS patients can be observed for the feature heterogeneity. Since *n* takes only integer values, the mean instead of the median was used for reasons of accuracy. Note that all properties are shown centered to the population mean and normalized to the population standard deviation. **(e)** A matrix containing the Wasserstein-2 distance between any two individuals, calculated here between the histograms for the feature heterogeneity. Dashed lines separate the groups.

210 a radius of  $7.45 \mu\text{m}$  from the original cell. The value of  $7.45 \mu\text{m}$  was chosen such that it corresponds  
 211 to the average position of the local minimum between the first and second correlation shell of  
 212 the pair correlation function. Prior to analysis, the data is standardized and normalized. To do so,  
 213 the mean value  $\mu$  of the total population, that is all granule cells of all subjects, is subtracted from  
 214 each individual measurement  $x$  and divided by the standard deviation  $\sigma$  of the population with  
 215  $z = (x - \mu)/\sigma$ . This is done separately for each feature. The standardized population then has an  
 216 expectation value of zero and a variance of one. After standardization, we construct a 6d feature  
 217 space out of the six features. Figure 4a shows 2d projections of a point cloud in feature space.  
 218 Plotting the individual features of all nuclei from a subject as histograms (see Fig. 4b), shows that  
 219 all features are approximately Gaussian distributed. We first examine differences between groups  
 220 by creating violin plots out of the 1d histograms. When doing this for the heterogeneity  $s$ , a clear  
 221 trend between groups can be identified (see Figure 4c). The median values of the MS group are  
 222 all higher than those of the Control group. However for the remaining features, no distinct trends



223 can be found (cf. Appendix 3). Furthermore, the median values over the neuron populations for all  
 224 features are calculated. Figure 4d shows the median values of all individuals and for each feature.  
 225 Again, a significant difference between the groups can be found for the heterogeneity  $s$ , whereas  
 226 for the remaining features, no statistically significant result can be inferred. In order to quantify  
 227 group differences, a t-test (Welch, double-sided) is applied to the median values. The calculated  
 228 p-values are listed together with the averaged median values of the nuclei parameters in Table 1.  
 229 A  $p$  value of 0.001 confirms a significant difference in heterogeneity, whereas for the other features  
 230 no differences were found between Controls and MS patients. Note that the  $p$  values reflect group  
 231 differences with respect to the twelve median values rather than to the entire neuron population,  
 232 which we investigate next in more detail.

233 In fact, in addition to t-testing the median values, the entire distribution in the multidimensional  
 234 feature space can be compared by metrics of optimal transport (OT) theory. Since the neuronal  
 235 nuclei of each subject are not sufficiently well represented by only their median or mean values,  
 236 comparing the entirety of recorded nuclei between subjects will allow for a more complete and  
 237 powerful comparison, and hence also a more sensitive test of possible pathological alterations.  
 238 Originally developed to model logistic transport problems, today OT is a popular tool in data anal-  
 239 ysis *Peyré and Cuturi (2019)* since it allows measuring the similarity of distributions by the minimal  
 240 “transportation cost”. As explained above, OT has the decisive advantage over classical statisti-  
 241 cal approaches that it takes the entire neuron population into account, enabling to detect small  
 242 movements of subpopulations as well as to compare distributions not only in a single dimension  
 243 (feature) but in high dimensional space taking all features into account simultaneously. We will use  
 244 OT in two steps: first we compare single feature histograms one-by-one and then compare the full  
 245 6d point clouds with OT. To analyze the former, we compute the pairwise Wasserstein-2 distance  
 246 between all histograms, which for two discrete measures  $\mu$  and  $\nu$  and Euclidean ground metric is  
 247 formulated as

$$\mathcal{W}_2(\mu, \nu) = \min_{P \in \Pi(\mu, \nu)} \sum_{i=1}^{N_\mu} \sum_{j=1}^{N_\nu} |x_i - y_j|^2 P_{i,j}, \quad (3)$$

248 where  $\mathbf{P}$  is the optimal coupling between  $\mu$  and  $\nu$ ,  $\Pi$  the set of all couplings, and  $x, y$  denote the  
 249 positions of the bins. For the calculation of  $\mathcal{W}$  the *Python Optimal Transport* - package by *Flamary*  
 250 *et al. (2021)* was used. The calculated pairwise Wasserstein distances are arranged in a matrix,  
 251 which is shown in Fig. 4e. Dashed lines separate the two groups and divide the matrix into four  
 252 quadrants. The higher values for  $\mathcal{W}$  in the upper right quadrant compared to the lower right and  
 253 upper left quadrants implies that the distances between subjects of different groups are larger  
 254 than within a group. This indicates a group segregation in the feature heterogeneity, as already

| Median over subject<br>neuron population                 | ALL   |      | CTRL  |      | MS    |      | $p^*$ |
|----------------------------------------------------------|-------|------|-------|------|-------|------|-------|
|                                                          | mean  | std  | mean  | std  | mean  | std  |       |
| Rel. electron density $\rho$ ( $1/\text{nm}^3$ )         | 31.23 | 5.38 | 29.19 | 5.02 | 33.26 | 4.85 | 0.225 |
| Heterogeneity $s$ ( $1/\text{nm}^3$ )                    | 8.78  | 0.94 | 8.01  | 0.56 | 9.55  | 0.51 | 0.001 |
| Volume $v$ ( $\mu\text{m}^3$ )                           | 26.83 | 4.41 | 28.35 | 5.35 | 25.3  | 2.38 | 0.283 |
| Sphericity $\varphi$                                     | 0.62  | 0.01 | 0.63  | 0.01 | 0.62  | 0.01 | 0.569 |
| $nm$ within radius of $7.45 \mu\text{m}^*$               | 7.24  | 1.2  | 6.83  | 0.75 | 7.66  | 1.41 | 0.281 |
| Nearest-neigh. dist. $d_{nn}$ ( $\mu\text{m}$ )          | 4.38  | 0.22 | 4.44  | 0.2  | 4.32  | 0.22 | 0.391 |
| Cell density $\bar{\rho}_n$ ( $\cdot 10^6/\text{mm}^3$ ) | 3.05  | 0.64 | 2.99  | 0.43 | 3.61  | 0.64 | 0.091 |

**Table 1.** Overview of granule cell parameters. The data and  $p$  values are calculated from the median values of the subject populations prior to standardization. The  $p$  value is with 0.001 very low for heterogeneity. The values of the electron density indicate the difference to the electron density of the average medium, which is paraffin in this case. \*Since  $nm$  takes only integer values, the population mean instead of the median was used for reasons of accuracy.

255 suspected from the median values. For the remaining features, whose charts can be seen in the  
256 Appendix 3, again no clear trends can be identified.

### 257 **Multidimensional analysis with OT**

258 In addition to the 1d-histograms, we next analyze the full six-dimensional point cloud distribution  
259 with optimal transport. Since the OT calculations of the point clouds are computationally expen-  
260 sive, they will be approximated by multidimensional Gaussian distributions, whose mean and co-  
261 variance matrix are given by the empirical mean and covariance matrix of the point clouds. Note  
262 that the above analysis can also be applied to the point clouds, yielding the same results (com-  
263 pare Appendix 4). Figure 5a shows the Gaussian distributions in a 2d subspace represented by  
264 ellipses. The ellipses are centered around the mean, the orientation of the principal axes is given  
265 by the eigenbasis of the covariance matrix, and their length by the square root of the correspond-  
266 ing eigenvalues, which gives the  $1-\sigma$  range around the mean. The Gaussians have the advantage  
267 that the Wasserstein distance between them can be calculated analytically by combining the Bures  
268 metric *Forrester and Kieburg (2016)* on the covariance matrices  $\Sigma$  with the Euclidean distance on  
269 the mean values  $\mathbf{m}$  according to

$$\mathcal{W}_2^2(\alpha, \beta) = \|\mathbf{m}_\alpha - \mathbf{m}_\beta\|^2 + \mathcal{B}(\Sigma_\alpha, \Sigma_\beta)^2, \quad (4)$$

270 where the Bures metric  $\mathcal{B}$  is defined for positive definite matrices as

$$\mathcal{B}(\Sigma_\alpha, \Sigma_\beta)^2 \stackrel{\text{def.}}{=} \text{tr} \left( \Sigma_\alpha + \Sigma_\beta - 2(\Sigma_\alpha^{1/2} \Sigma_\beta \Sigma_\alpha^{1/2})^{1/2} \right) \quad (5)$$

271 Before using the Wasserstein distances in further steps below, it must be noted that the Wasser-  
272 stein space of distributions is not a linear vector space. Contrarily, it forms a Riemannian manifold  
273 (curved hypersurface), which impedes straightforward application of standard linear algebra tools  
274 such as principal component analysis (PCA). To get around this, we follow the *Linearized Optimal*  
275 *Transport*-framework (LOT) introduced by *Wang et al. (2013)* (for a review see *Kolouri et al. (2017)*)  
276 in order to approximate the manifold locally by its tangent space at a suitable reference point (for  
277 full details see appendix 2 and references). As reference point, we choose the barycenter of all  
278 samples (whole population), which itself is a Gaussian distribution with mean and covariance ma-  
279 trix given by the fixed-point algorithm of *Álvarez-Esteban et al. (2016)*. After projecting the samples  
280 to the linear tangent space the Wasserstein distance between two embedded samples is approx-  
281 imated by the Euclidean distance between the embedding vectors. Figure 5 shows the linearized  
282 Wasserstein distances between any two subjects. The values are higher in the inter-group quad-  
283 rant, than in the intra-group quadrants, ( $\mathcal{W}_{\text{inter}}^2 = 2.039$ , compared to  $\mathcal{W}_{\text{intraMS}}^2 = 1.41$ ,  $\mathcal{W}_{\text{intraCTRL}}^2 = 1.56$ )  
284 indicating a possible segregation of the groups. Moving to the tangent space comes with a change  
285 of perspective: in tangent space, each subject is now represented by a single point instead of a  
286 whole point cloud on feature space. We can thus interpret it as a “space of subjects”. The di-  
287 mensionality of the tangent space equals that of the manifold of covariance matrices and mean  
288 values, given by 21 independent entries of the covariance matrix (accounting for symmetry) and  
289 6 mean values, totaling in 27 dimensions. Before performing further analysis in tangent (or sub-  
290 ject) space, we apply principal component analysis (PCA) to reduce the number of dimensions to  
291 3. The three principal components capture 95% of the data variance. Plotting the coordinates of  
292 the subjects in the reduced 3d PCA eigenbasis as depicted in Fig. 5c, reveals that the subjects form  
293 two clusters according to their groups. Each principal component contributes almost equally to  
294 the segregation of the groups. Note that the construction of the subject-space is done without any  
295 prior categorization into groups. We further apply a simple linear support vector machine (SVM), in  
296 3d which returns a hyperplane for classification. Figure 5d shows the distances of the samples to  
297 the hyperplane. The hyperplane divides the samples exactly into their classes, demonstrating the  
298 data are linearly separable. By the so-called “push-forward” it is possible to map from the tangent  
299 space back to the space of Gaussian distributions and thus movements in tangent space can be

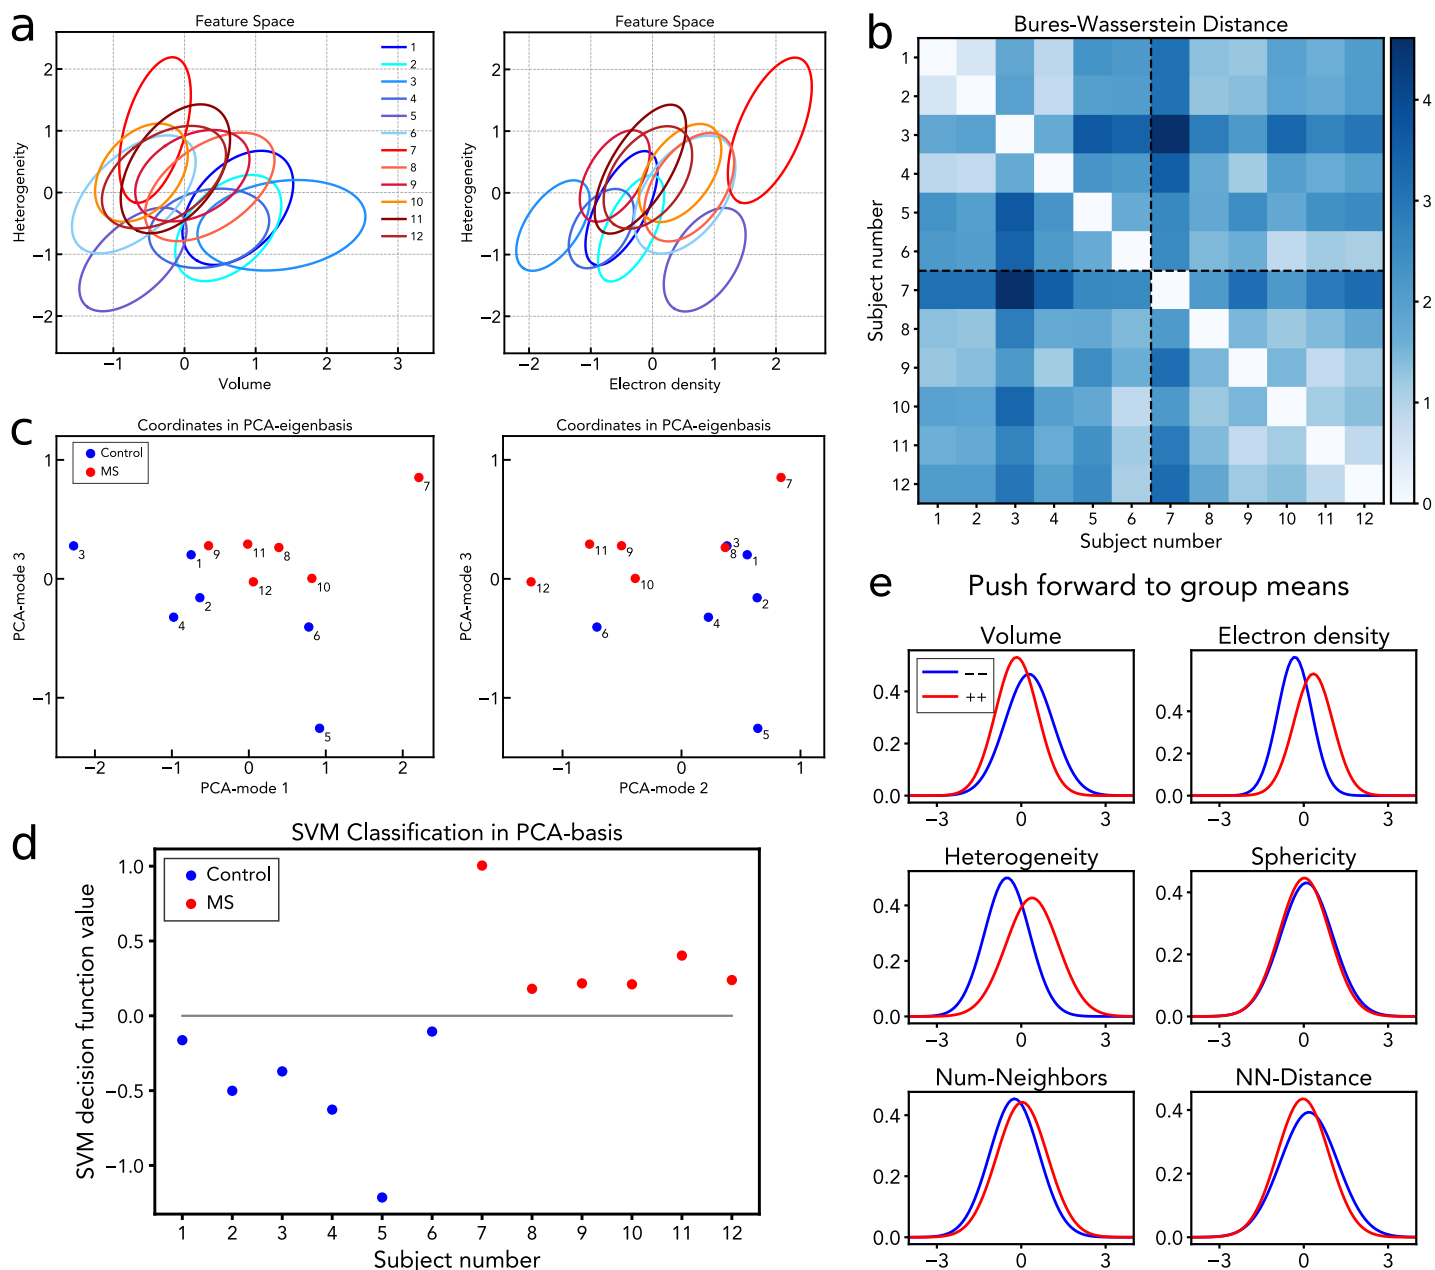

**Figure 5.** Optimal Transport Analysis. **(a)** The point clouds are approximated by multivariate Gaussian distributions, such that distances can be evaluated in closed form via the Bures metric (5)). The multivariate Gaussians are represented here by  $1 - \sigma$  ellipses around the center of mass in 2d projections of the feature space. **(b)** After projection to the linear tangent space, all pairwise distances between the 6d ellipsoids are computed in linear approximation. Distances are arranged in a matrix chart, where dashed lines separate groups. **(c)** Following a PCA in tangent space, a low-dimensional embedding can be constructed, in which individuals are represented by single points instead of distributions. A segregation of the two groups into two clusters is observed. Note that this space is constructed without any prior knowledge about the sample classes. **(d)** Applying an SVM to the subject coordinates in the PCA-reduced space reveals a hyperplane separating the two groups. **(e)** The connection vector between the means of both groups in the subject space is used to generate “prototypical” distributions for both MS and Control via the so-called “push forward” operation. Histograms of these distributions, plotted for each feature and each group separately, inform about the pathological alterations of the nuclei from Control(-) to MS(+).

300 translated to changes in the distributions of the individual features. We use this to study the differ-  
 301 ence between the prototypical distributions of both classes. For this purpose, the mean values of  
 302 both groups in the subject space are calculated, whose difference vector can be interpreted as the  
 303 main direction of discrimination between healthy and pathological. Via the “push-forward” we then

304 generate distributions corresponding to the (purely virtual) subjects obtained by moving from the  
305 origin of the tangent space along the difference vector, once into the Control- and once into the MS  
306 direction. We interpret these as prototypical representatives of MS- and Control subjects. From  
307 these distributions, histograms can be generated for each feature separately, which are shown in  
308 Figure 5e. It can be seen that the histograms differ in several features. This result allows to indicate  
309 a pathological transformation, which the granule cell nuclei undergo during the disease. Accord-  
310 ing to the histograms, granule cells of multiple sclerosis patients compared to those of healthy  
311 Controls have:

- 312 • a smaller volume  $v$
- 313 • a higher electron density  $\rho$
- 314 • a higher heterogeneity  $s$

## 315 Discussion

316 The first structural property and question to be discussed is a simple one: does the spatial density  
317 of neurons, which is already exceptionally high in the granular layer of the cerebellum, increase  
318 further in MS, and if so why could this possibly be the case? Indeed, this study finds a 16% increase in  
319 density for the MS group, albeit only at marginally statistical significance  $p = 0.09$ . Cell segmentation  
320 and counting in the reconstructed volumes gave a direct assessment of cellular density, obviously  
321 superior to conventional estimates based on 2d observation. The increase is further corroborated  
322 and detailed by comparing the structure factors  $S(q)$  describing the short range order of granule  
323 cells. Note that the center of mass positions for all cellular nuclei in a certain volume makes it pos-  
324 sible to statistically analyze the short range order in quantitative terms. Here, the overall increase  
325 in density is reflected by a shift of the first maximum of  $S(q)$  towards higher  $q$ , indicating a smaller  
326 next neighbor distance in the MS group. We can tentatively put forward the following interpreta-  
327 tion: Since it is unreasonable to assume that new neurons have been formed in the course of the  
328 disease, the observation of higher density and shorter next neighbor distance could be explained  
329 only by tissue shrinkage, possibly as a response to a less active state of neurons (see below) and  
330 tissue remodeling in the inter-neuronal space, the neuropil. This would be in line with earlier stud-  
331 ies which discussed tissue loss and brain atrophy as a result of axonal damage by demyelination  
332 and neurodegeneration *Weier et al. (2015)*; *Lassmann et al. (2007)*; *Haider et al. (2016)*.

333 Next, we address the structural properties (features) of the neuronal nuclei: heterogeneity, which  
334 quantifies the density variation with the nucleus, is the most significant feature changing between  
335 MS and Control. Already on the level of the median values it shows a significant increase. This  
336 is further corroborated by OT analysis, which compares the entire histogram of a feature, and  
337 therefore can also account for changes in neuronal population of a subject when its mean value  
338 remains constant. If, for example, transitions occur in the width or shape of the distribution such  
339 as increased tails, this may not affect median or mean by left/right symmetry but clearly changes  
340 the distribution. In this sense, OT is a more complete and more sensitive probe of structural al-  
341 terations between the groups. For a more transparent analysis we approximate the non-linear  
342 OT space by a linear tangent space and subsequent reduction with PCA to three dimensions. The  
343 resulting embedding shows a clear separation between the groups, which is identified without a  
344 prior hypothesis by the OT analysis. A simple SVM classifier is then able to perfectly separate the  
345 two classes along an axis. Alternatively we consider the axis spanned by the difference of the class  
346 means. Via the push-forward we find that this axis encodes a transition to increased heterogeneity,  
347 smaller volume, and higher density. We might call it an axis of compactness.

348 How can this shift towards a more compact nuclear state, i.e. more heterogeneous, smaller and  
349 denser nuclei be interpreted? By considering the spatial scales which contribute to heterogeneity,  
350 it is plausible to attribute this feature to an increased ratio of heterochromatin to euchromatin  
351 *Le Gros et al. (2016)*. In fact, we put this interpretation forward in our preceding study on hip-  
352 pocampal granule cells in AD, where a very similar observation was made *Eckermann et al. (2021)*.



353 Accordingly, a transcriptionally less active state of the neuron corresponds to the more compact-  
354 fied nucleus. These states could be interpreted as a phenomenon of cellular senescence *Kritsilis*  
355 *et al. (2018)*. The fact that this is found similarly in the present work for cerebellar granule cells in  
356 MS as for hippocampal granule cells in AD before, suggests the hypothesis that a more compact  
357 nucleus resulting from cellular senescence is a more general phenomenon in neurodegeneration,  
358 downstream from various patho-metabolic processes.

359 The largest weakness of the present study is its still too small size ( $N_{MS} = 6/N_{CTRL} = 6$ ). The power  
360 of OT may not or not sufficiently compensate for this, and a higher number of subjects should  
361 certainly be probed in future extension of this work. While this would not be much of a problem  
362 per se in view of method throughput (XPCT data acquisition and analysis with a fully automated  
363 pathway), the post mortem collection of human tissue is not easily extended to higher numbers,  
364 given necessary procedures of consent and authorizations. Further improvements may require  
365 concerted efforts in operation of tissue banks, proper documentation, and curated collections.

366 What the current study has not touched upon is the important role of demyelinated lesions in  
367 MS. We did not make any attempt to find specific structural signs of lesions or to identify them  
368 by correlative imaging with immunohistochemistry. To this end, one must also critically put into  
369 question whether this is best carried out with unstained and unlabeled tissue as in the present  
370 case, or whether heavy metal stains or labels for XPCT would be required, for example also to  
371 locate regions of de- and remyelination. Further, it would make sense to increase the scan volume  
372 at the cost of lower resolution, and to use very clear cases to 'train' any search for lesions. Given  
373 the substantial role that magnetic resonance imaging (MRI) can play in MS diagnosis as an in vivo  
374 imaging method *Wattjes et al. (2015)*, there is a further very worthwhile goal for future extension  
375 of this work: using XPCT analyses and correlative XPCT/MRI imaging, one could correlate the post  
376 mortem 3d histology and the tissue fine structure with more coarse grained but also functional  
377 signals of MRI. Note that as 3d imaging technique XPCT is particularly well suited for a multiscale  
378 histopathology underpinning of MRI data.

379 Finally, a critical reflection regarding the relevance of structural data: while it is undisputed that ge-  
380 nomics, proteomics and metabolics are relevant to gain a quantitative understanding of neurode-  
381 generative diseases, the relevance of the cytoarchitecture is admittedly less clear. In view of the  
382 intrinsic polydispersity of structural features on the cellular and tissue level, differences between  
383 individuals can easily screen effects associated with disease progression. Further, it is less known  
384 than for biochemical processes, whether structural alterations are upstream or downstream from  
385 a particular pathological development. If studies of cytoarchitecture are to become an 'omics',  
386 structural data has to be very comprehensive, covering large patient- and control-groups, quan-  
387 titative and fully digital. It should certainly also represent the full three-dimensionality of tissue.  
388 Finally, without segmentation and morphometric analysis, 3d data alone will remain illustrative  
389 and anecdotal, since visual inspection is not as easily possible as for 2D sections by a pathologist.  
390 While the present work can surely not meet all expectations of how structural brain tissue studies  
391 should be carried out in future, it is meant as an example and to provide useful components to  
392 further develop the analysis workflow. We can expect significant future progress in segmentation  
393 by deep learning and in optimal transport theory, as for the data acquisition itself and its image  
394 quality.

395 In order to help this become a reality, the present work is carried out as part of a larger effort to  
396 advance quantitative assessment of neuronal cytoarchitecture by XPCT. The method can extend  
397 conventional histology by a further dimension and therefore is particularly well suited for digital-  
398 ization and automated analysis of tissue structures. To this end it is a decisive advantage that  
399 XPCT does not rely on tissue sectioning, is non-destructive, and compatible with all other analy-  
400 ses which can be carried out subsequently. Furthermore, XPCT can be performed on unstained  
401 tissue preserved in FFPE blocks, which is the conventional way to store and preserve tissues in  
402 neuropathology.

## 403 **Materials and Methods**

### 404 **Data acquisition and reconstruction**

405 Tissue asservation, data acquisition, phase retrieval and tomographic reconstruction of all data  
406 analyzed here was performed previously, as reported in *Töpperwien et al. (2018)*. In short, hu-  
407 man cerebellum tissue samples were obtained post mortem from twelve individuals (six healthy  
408 control, six multiple sclerosis) by routine autopsy in agreement with local ethics guidelines and  
409 approval procedures at the University Medical Center Göttingen. Small biopsy-punches from the  
410 formalin fixed and paraffin embedded tissue (FFPE) were placed in a Kapton tube for scanning. X-  
411 ray phase contrast tomography experiments were carried out at the GINIX endstation of the P10  
412 undulator beamline at the PETRAIII storage ring at the Deutsches Elektronen Synchrotron (DESY) in  
413 Hamburg. The undulator beam was monochromatized to an energy of 13.8 keV (Si(111) monochro-  
414 mator). Note that for one sample (CTRL5, different beamtime), the data was collected at 8 keV.  
415 After prefocussing the x-rays by a pair of Kirkpatrick-Baez (KB) mirrors and coupling into a wave-  
416 guide, the coherence and spatially filtered beam illuminates the sample at distance  $z_{01} \simeq 0.1$  m be-  
417 hind the waveguide exit, and the magnified Fresnel diffraction pattern (hologram) is recorded by a  
418 fibre-coupled sCMOS detector positioned at distance  $z_{02} \simeq 5.1$  mm, resulting in a geometric magnifi-  
419 cation  $M = \frac{z_{02}}{z_{01}}$ . From the measured magnified holograms (wave optical projection images), phase  
420 retrieval was performed using the contrast transfer function (CTF)-based algorithm *Cloetens et al.*  
421 *(1999)*, implemented in *Lohse et al. (2020)*. The 3d information was reconstructed with the Matlab  
422 implemented function of the inverse Radon-transformation ('iradon') combined with a standard  
423 Ram-Lak filter. The reconstructed samples cover a field of view of  $336 \times 336 \times 375 \mu\text{m}^3$  with a voxel  
424 size of 187 nm, sufficient to resolve various histological features, including the nuclei of the granule  
425 cells.

### 426 **Segmentation of the granule cell nuclei**

427 The segmentation was carried out with the segmentation and visualization software package Arivis  
428 Vision4D (Zeiss AG, Germany). Using the Blob Finder operation of Arivis - well suited to find round,  
429 roughly spherically shaped objects - several ten thousand neurons were detected in each sam-  
430 ple. After applying different filters and removing objects outside the granular layer with a mask,  
431 a homogeneous distribution of sphere-like segments was obtained, adequately representing the  
432 granule cell nuclei. From the segmented nuclei, several features were extracted for the analysis.  
433 Detailed information about the full segmentation workflow is given in Appendix 1.

### 434 **Structural features of the granule cell nuclei**

435 For the analysis, six features of the segmented nuclei were chosen: the volume  $v$ , the mean of the  
436 electron density  $\rho$ , the heterogeneity (variance of the electron density within the nucleus)  $s$ , the  
437 sphericity  $\phi$ , the distance to the nearest neighbor nuclei  $d_{nn}$  and the number of neighbors  $nn$  within  
438 a radius of  $7.45 \mu\text{m}$ . The radius for the latter definition was chosen as the local minimum between  
439 the first and second correlation shell of the pair correlation function  $g(r)$ .

### 440 **Optimal Transport analysis**

441 Optimal transport distances between 1d feature histograms were computed by using the Wasser-  
442 stein - 2 metric  $\mathcal{W}_2$ , as implemented in *Flamary et al. (2021)*. For the analysis of the multidimen-  
443 sional distributions, each point cloud was approximated by a normal distribution with covariance  
444 matrix  $\Sigma$  and mean  $\mu$ . Between Gaussians, the Wasserstein metric can be rapidly calculated by us-  
445 ing the Bures metric  $\mathcal{B}$ , see *Forrester and Kieburg (2016)*. To overcome the Riemannian structure  
446 of  $\mathcal{W}$ , we used the *Linearized OT* framework as described in *Wang et al. (2013)* and project the dis-  
447 tributions into a linear tangent space. An approximate Wasserstein barycenter, computed by the  
448 fixed-point algorithm *Álvarez-Esteban et al. (2016)*, served as reference point for linearization. This  
449 allowed us to construct a subject space, in which subjects were arranged in two clusters according

450 to their groups (without prior classification) and could be linearly separated by SVM (implemented  
451 in *Pedregosa et al. (2011)*). For more details of the OT framework, see Appendix 2.

## 452 Acknowledgments

453 We thank Jannis Schaeper for initial help with the Arivis software. T.S. and B.S. acknowledge support  
454 by the Deutsche Forschungsgemeinschaft (DFG, German Research Foundation) through project  
455 CRC 1456/ A03. We also thank Markus Osterhoff for IT support in the framework of the data infras-  
456 tructure project SFB 1456/ INF. C.S. received funding from the Deutsche Forschungsgemeinschaft  
457 (DFG, German Research Foundation) – CRC 274/1- Project ID 408885537 B01, the DFG Sta 1389/5-  
458 1 (individual research grant). C.S. and T.S. are supported by the DFG under Germany's Excellence  
459 Strategy (EXC 2067/1-390729940). J.F. was supported by the clinician scientist program of the CRC  
460 274.

## 461 References

- 462 **Albers J**, Pacilé S, Markus MA, Wiart M, Vande Velde G, Tromba G, Dullin C. X-ray-based 3D virtual histol-  
463 ogy—Adding the next dimension to histological analysis. *Molecular Imaging and Biology*. 2018; 20(5):732–  
464 741. doi: <https://doi.org/10.1007/s11307-018-1246-3>.
- 465 **Albert M**, Barrantes-Freer A, Lohrberg M, Antel JP, Prineas JW, Palkovits M, Wolff JR, Brück W, Stadelmann C.  
466 Synaptic pathology in the cerebellar dentate nucleus in chronic multiple sclerosis. *Brain Pathology*. 2017;  
467 27(6):737–747. doi: <https://doi.org/10.1111/bpa.12450>.
- 468 **Álvarez-Esteban PC**, Del Barrio E, Cuesta-Albertos J, Matrán C. A fixed-point approach to barycenters  
469 in Wasserstein space. *Journal of Mathematical Analysis and Applications*. 2016; 441(2):744–762. doi:  
470 <https://doi.org/10.1016/j.jmaa.2016.04.045>.
- 471 **Azevedo FA**, Carvalho LR, Grinberg LT, Farfel JM, Ferretti RE, Leite RE, Filho WJ, Lent R, Herculano-Houzel S. Equal  
472 numbers of neuronal and nonneuronal cells make the human brain an isometrically scaled-up primate brain.  
473 *Journal of Comparative Neurology*. 2009; 513(5):532–541. doi: <https://doi.org/10.1002/cne.21974>.
- 474 **Bosch C**, Ackels T, Pacureanu A, Zhang Y, Peddie CJ, Berning M, Rzepka N, Zdora MC, Whiteley I, Storm M, et al.  
475 Functional and multiscale 3D structural investigation of brain tissue through correlative in vivo physiology,  
476 synchrotron microtomography and volume electron microscopy. *Nature communications*. 2022; 13(1):1–16.  
477 doi: <https://doi.org/10.1038/s41467-022-30199-6>.
- 478 **Cloetens P**, Ludwig W, Baruchel J, Van Dyck D, Van Landuyt J, Guigay J, Schlenker M. Holotomography: Quantita-  
479 tive phase tomography with micrometer resolution using hard synchrotron radiation x rays. *Applied physics*  
480 *letters*. 1999; 75(19):2912–2914. doi: <https://doi.org/10.1063/1.125225>.
- 481 **Cuturi M**. Sinkhorn Distances: Lightspeed Computation of Optimal Transportation Distances. *Advances in*  
482 *Neural Information Processing Systems*. 2013; <http://arxiv.org/abs/1306.0895>.
- 483 **Dejea H**, Garcia-Canadilla P, Cook AC, Guasch E, Zamora M, Crispi F, Stampanoni M, Bijnens B, Bonnin A. Com-  
484 prehensive analysis of animal models of cardiovascular disease using multiscale x-ray phase contrast tomog-  
485 raphy. *Scientific reports*. 2019; 9(1):1–12. doi: <https://doi.org/10.1038/s41598-019-54945-x>.
- 486 **Eckermann M**, Schmitzer B, van der Meer F, Franz J, Hansen O, Stadelmann C, Salditt T. Three-Dimensional Vir-  
487 tual Histology of the Human Hippocampus Based on Phase-Contrast Computed Tomography. *Proceedings of*  
488 *the National Academy of Sciences*. 2021; 118(48). doi: <https://www.pnas.org/content/118/48/e2113835118>.
- 489 **Flamary R**, Courty N, Gramfort A, Alaya MZ, Boisbunon A, Chambon S, Chapel L, Corenflos A, Fatras K, Fournier  
490 N, et al. Pot: Python optimal transport. *Journal of Machine Learning Research*. 2021; 22(78):1–8. <https://pythonot.github.io/>.
- 491
- 492 **Forrester PJ**, Kieburg M. Relating the Bures measure to the Cauchy two-matrix model. *Communications in*  
493 *Mathematical Physics*. 2016; 342(1):151–187. doi: <https://doi.org/10.1007/s00220-015-2435-4>.
- 494 **Frohn J**, Pinkert-Leetsch D, Missbach-Güntner J, Reichardt M, Osterhoff M, Alves F, Salditt T. 3D virtual histol-  
495 ogy of human pancreatic tissue by multiscale phase-contrast X-ray tomography. *Journal of Synchrotron*  
496 *Radiation*. 2020; 27(6):1707–1719. doi: <https://doi.org/10.1107/S1600577520011327>.

- 497 **Haider L**, Zrzavy T, Hametner S, Höftberger R, Bagnato F, Grabner G, Trattnig S, Pfeifenbring S, Brück W, Lass-  
498 mann H. The topography of demyelination and neurodegeneration in the multiple sclerosis brain. *Brain*. 2016;  
499 139(3):807–815. doi: <https://doi.org/10.1093/brain/aww398>.
- 500 **Khimchenko A**, Deyhle H, Schulz G, Schweighauser G, Hench J, Chicherova N, Bikis C, Hieber SE, Müller B. Ex-  
501 tending two-dimensional histology into the third dimension through conventional micro computed tomog-  
502 raphy. *NeuroImage*. 2016; 139:26–36. doi: <https://doi.org/10.1016/j.neuroimage.2016.06.005>.
- 503 **Kolouri S**, Park S, Thorpe M, Slepčev D, Rohde GK. Optimal Mass Transport: Signal process-  
504 ing and machine-learning applications. *IEEE Signal Processing Magazine*. 2017; 34(4):43–59. doi:  
505 <https://doi.org/10.1109/MSP.2017.2695801>.
- 506 **Kritsilis M**, V Rizou S, Koutsoudaki PN, Evangelou K, Gorgoulis VG, Papadopoulos D. Ageing, cellular senes-  
507 cence and neurodegenerative disease. *International journal of molecular sciences*. 2018; 19(10):2937. doi:  
508 <https://doi.org/10.3390/ijms19102937>.
- 509 **Kuan AT**, Phelps JS, Thomas LA, Nguyen TM, Han J, Chen CL, Azevedo AW, Tuthill JC, Funke J, Cloetens P, et al.  
510 Dense neuronal reconstruction through X-ray holographic nano-tomography. *Nature neuroscience*. 2020;  
511 23(12):1637–1643. doi: <https://doi.org/10.1038/s41593-020-0704-9>.
- 512 **Kutzelnigg A**, Faber-Rod JC, Bauer J, Lucchinetti CF, Sorensen PS, Laursen H, Stadelmann C, Brück W, Rauschka  
513 H, Schmidbauer M, et al. Widespread demyelination in the cerebellar cortex in multiple sclerosis. *Brain*  
514 *pathology*. 2007; 17(1):38–44. doi: <https://doi.org/10.1111/j.1750-3639.2006.00041.x>.
- 515 **Lassmann H**, Brück W, Lucchinetti CF. The immunopathology of multiple sclerosis: an overview. *Brain pathol-*  
516 *ogy*. 2007; 17(2):210–218. doi: <https://doi.org/10.1111/j.1750-3639.2007.00064.x>.
- 517 **Le Gros MA**, Clowney EJ, Magklara A, Yen A, Markenscoff-Papadimitriou E, Colquitt B, Myllys M, Kellis M, Lomvar-  
518 das S, Larabell CA. Soft X-ray tomography reveals gradual chromatin compaction and reorganization during  
519 neurogenesis in vivo. *Cell reports*. 2016; 17(8):2125–2136. doi: <https://doi.org/10.1016/j.celrep.2016.10.060>.
- 520 **Lohse LM**, Robisch AL, Töpperwien M, Maretzke S, Krenkel M, Hagemann J, Salditt T. A phase-retrieval tool-  
521 box for X-ray holography and tomography. *Journal of Synchrotron Radiation*. 2020; 27(3):852–859. doi:  
522 <https://doi.org/10.1107/S1600577520002398>.
- 523 **Manto M**, Gruol DL, Schmähmann JD, Koibuchi N, Rossi F. *Handbook of the cerebellum and cerebellar disor-*  
524 *ders*, vol. 4. Springer; 2013. <https://link.springer.com/referencework/10.1007/978-94-007-1333-8>.
- 525 **Massimi L**, Pieroni N, Maugeri L, Fratini M, Brun F, Bukreeva I, Santamaria G, Medici V, Poloni TE, Balducci C,  
526 et al. Assessment of plaque morphology in Alzheimer's mouse cerebellum using three-dimensional X-ray  
527 phase-based virtual histology. *Scientific reports*. 2020; 10(1):1–10. doi: <https://doi.org/10.1038/s41598-020-68045-8>.
- 528
- 529 **Najman L**, Couprie M. Watershed algorithms and contrast preservation. In: *International conference on discrete*  
530 *geometry for computer imagery* Springer; 2003. p. 62–71. doi: [https://doi.org/10.1007/978-3-540-39966-7\\_5](https://doi.org/10.1007/978-3-540-39966-7_5).
- 531 **Parmar K**, Stadelmann C, Rocca MA, Langdon D, D'Angelo E, D'Souza M, Burggraaff J, Wegner C, Sastre-Garriga  
532 J, Barrantes-Freer A, et al. The role of the cerebellum in multiple sclerosis—150 years after Charcot. *Neuro-*  
533 *science & Biobehavioral Reviews*. 2018; 89:85–98. doi: <https://doi.org/10.1016/j.neubiorev.2018.02.012>.
- 534 **Pedregosa F**, Varoquaux G, Gramfort A, Michel V, Thirion B, Grisel O, Blondel M, Prettenhofer P, Weiss R,  
535 Dubourg V, et al. Scikit-learn: Machine learning in Python. *the Journal of machine Learning research*. 2011;  
536 12:2825–2830. doi: <https://doi.org/10.48550/arXiv.1201.0490>.
- 537 **Peng T**, Balijepalli A, Gupta SK, LeBrun T. Algorithms for on-line monitoring of micro spheres in an optical  
538 tweezers-based assembly cell. *J Comput Inf Sci Eng*. 2007; 7:330–338. doi: <https://doi.org/10.1115/1.2795306>.
- 539 **Peyré G**, Cuturi M. Computational Optimal Transport: With Applications to Data Science. *Foundations and*  
540 *Trends® in Machine Learning*. 2019; 11(5-6):355–607. doi: <https://doi.org/10.1561/22000000073>.
- 541 **Reichardt M**, Moller Jensen P, Andersen Dahl V, Bjorholm Dahl A, Ackermann M, Shah H, Länger F, Werlein C,  
542 Kuehnel MP, Jonigk D, Salditt T. 3D virtual histopathology of cardiac tissue from Covid-19 patients based on  
543 phase-contrast X-ray tomography. *eLife*. 2021; 10:e71359. doi: <https://doi.org/10.7554/eLife.71359>.
- 544 **Salditt T**, Osterhoff M, Krenkel M, Wilke RN, Priebe M, Bartels M, Kalbfleisch S, Sprung M. Compound focus-  
545 ing mirror and X-ray waveguide optics for coherent imaging and nano-diffraction. *Journal of synchrotron*  
546 *radiation*. 2015; 22(4):867–878. doi: <https://doi.org/10.1107/S1600577515007742>.



- 547 **Santambrogio F.** Optimal transport for applied mathematicians, vol. 55. Springer; 2015. <https://link.springer.com/book/10.1007/978-3-319-20828-2>.  
548
- 549 **Töpperwien M.** 3d virtual histology of neuronal tissue by propagation-based x-ray phase-contrast tomography.  
550 PhD thesis, University of Göttingen; 2018.
- 551 **Töpperwien M,** van der Meer F, Stadelmann C, Salditt T. Three-Dimensional Virtual Histology of Human  
552 Cerebellum by X-ray Phase-Contrast Tomography. Proceedings of the National Academy of Sciences. 2018;  
553 115(27):6940–6945. doi: <https://doi.org/10.1073/pnas.1801678115>.
- 554 **Vågberg W,** Persson J, Szekely L, Hertz HM. Cellular-resolution 3D virtual histology of human coronary arteries  
555 using x-ray phase tomography. Scientific reports. 2018; 8(1):1–7. doi: <https://doi.org/10.1038/s41598-018-29344-3>.  
556
- 557 **Wang W,** Slepčev D, Basu S, Ozolek JA, Rohde GK. A Linear Optimal Transportation Framework for Quantifying  
558 and Visualizing Variations in Sets of Images. International Journal of Computer Vision. 2013; 101(2):254–269.  
559 doi: <https://doi.org/10.1007/s11263-012-0566-z>.
- 560 **Wattjes M,** Steenwijk M, Stangel M. MRI in the diagnosis and monitoring of multiple sclerosis: an update.  
561 Clinical neuroradiology. 2015; 25(2):157–165. doi: <https://doi.org/10.1007/s00062-015-0430-y>.
- 562 **Weier K,** Banwell B, Cerasa A, Collins DL, Dogonowski AM, Lassmann H, Quattrone A, Sahraian MA, Siebner  
563 HR, Sprenger T. The role of the cerebellum in multiple sclerosis. The Cerebellum. 2015; 14(3):364–374. doi:  
564 <https://doi.org/10.1007/s12311-014-0634-8>.

565 **Appendix 1**

566 **Segmentation Workflow**

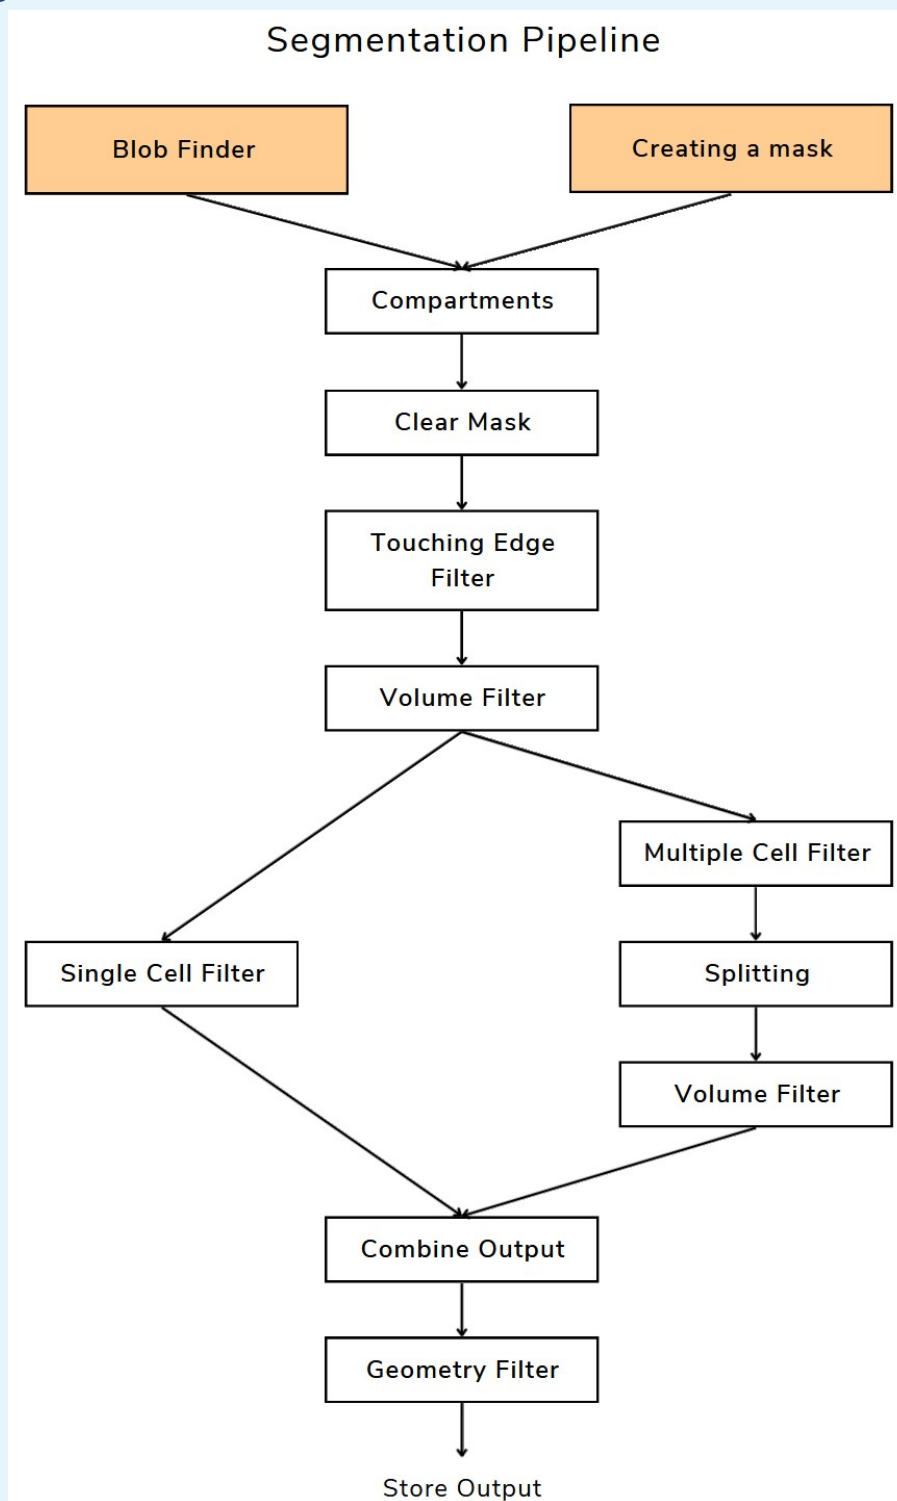

567  
568  
569

**Appendix 1 Figure 1.** Flowchart of the Arivis pipeline used for the segmentation of the granule cell nuclei. Orange fields indicate segment generating operations.

571 In order to segment the granule cell nuclei, the software Arivis was used. The workflow in  
572 Arivis is performed by pipelines - a sequence of operations which are executed consecu-  
573 tively. In the following the structure of the pipeline used for the segmentation is presented  
574 and the individual operations are briefly described.

575 • **Blob Finder:** The Blob Finder is the most important operation which generates the  
576 segments representing the granule cell nuclei used in the analysis. The algorithm  
577 is designed to find rounded, sphere-like 2d or 3d objects and has three parameters  
578 which can be customized. The concept is to find seed points with high probability to  
579 be the centre of a round object, followed by a watershed algorithm, letting objects  
580 grow outwards starting from the seed points. The following description of the algo-  
581 rithm is based on the Arivis manuals. Consider a gray scale image  $f : \mathbb{R}^3 \rightarrow \mathbb{R}$  which  
582 is convolved by a Gaussian Kernel  $g$  with:

583  
584  
585 
$$g(\mathbf{x}, t) = \frac{1}{2\pi t} e^{-\frac{\mathbf{x}\cdot\mathbf{x}}{2t}}. \quad (6)$$

586  $\mathbf{x}$  represents the pixel position and  $t$  is the scale of the convolution kernel given by

587  
588  
589  
590 
$$r = t\sqrt{n} \quad (7)$$

591 where  $n$  is the dimension (here = 3) and  $r$  is the “diameter”, which is one of the param-  
592 eters that can be set manually. After the convolution

593  
594  
595 
$$L(\mathbf{x}, t) = g(\mathbf{x}, t) * f(\mathbf{x}), \quad (8)$$

596 a Laplace operator is applied to the result  $\nabla^2 L(\mathbf{x}, t)$  which gives a probability map of  
597 possible blobs. This probability map is thresholded to create a binary mask and to  
598 find the seed points.

599  
600  
601  
602 
$$M(\mathbf{x}, t) = \begin{cases} 0 & \nabla^2 L(\mathbf{x}, t) < \epsilon \\ 1 & \text{else} \end{cases} \quad (9)$$

603 The adjustable parameter  $\epsilon$  is used to vary the number of considered objects. Subse-  
604 quently, the local maxima of the Laplacian image  $\nabla^2 L(\mathbf{x}, t)$  are used as markers for a  
605 topological Watershed transform *Najman and Couprie (2003)*. The result is masked  
606 with  $M(\mathbf{x}, t)$ . In this way  $\epsilon$  determines not only the number of created objects, but also  
607 their size. The last parameter is the “split sensitivity”, which defines whether two seed  
608 points in close vicinity are merged together or remain separated. The parameter op-  
609 erates like a threshold on the values of the probability map and determines whether  
610 many small objects or a few larger objects are observed. For the segmentation of the  
611 GC nuclei, the parameter were set as follows:

- 612  
613  
614  
615  
616
- Diameter: 3.74  $\mu\text{m}$
  - Probability Threshold: 26 %
  - Split Sensitivity: 24.72 %

617 These parameters were determined by visual inspection and were chosen the same  
618 for all samples.

619 • **Creating a mask:** Next a mask is drawn manually, which encloses only the granular  
620 layer. Segments created by the Blob Finder lying in the molecular layer, Purkinje layer  
621 or in the corners of the dataset, where the tomographic reconstruction does not yield  
622 completed information, are filtered out.

- 623 • **Compartments:** This operation creates a hierarchy between the mask and the Blob  
624 Finder segments. All segments which are not part of this hierarchy, i.e. all segments  
625 outside the mask, will be filtered out.
- 626 • **Clear mask:** Removes the mask object.
- 627 • **Touching Edge Filter:** This filter removes segments touching the edges of the dataset,  
628 since these could be truncated cells which would distort the statistics.
- 629 • **Volume Filter:** The volume filter removes segments which clearly do not represent  
630 granule cells, e.g. small artifact segments. The filter limits are determined by display-  
631 ing all segments in a 2d scatter plot according to the properties volume  $v$  and sphericity  
632  $\varphi$  (using the Object chart tool of Arivis) as shown in figure 2b. In this representation,  
633 three groups of segments can be identified: granule cells (middle), multiple cells (mid-  
634 dle) and artifacts (right). This assertion is corroborated by selecting segments of each  
635 group and inspect the 3d rendering. The artifact segments are filtered out, and the  
636 multiple cell segments are kept and split (see below). By visual inspection of the scatter  
637 plot, the filter limits are set to  $v < 10 \mu\text{m}^3$  and  $v > 100 \mu\text{m}^3$ .
- 638 • **Multiple Cell Filter:** Multiple cells occur when several cells close to each other are  
639 covered by only one segment. To ensure each cell is covered by exactly one segment,  
640 the multiple cell segments can be split (next operation). By visual inspection of the  
641 scatter plot, filters of  $\varphi < 0.58$  and  $v < 30 \mu\text{m}^3$  are determined to segregate the multiple  
642 cells from the single cells.
- 643 • **Splitting:** The splitting operation divides the multiple cell segments into well-defined  
644 segments covering single cells. The splitting uses a Watershed-Algorithm which takes  
645 the maxima found in a distance map as seed points. The distance map labels each  
646 pixel of a segment with the distance to the nearest non-segment pixel. The operation  
647 has the parameter “split sensitivity”, which operates like a threshold in the watershed  
648 algorithm and controls into how many parts the segments are split. For all samples, a  
649 value for the split sensitivity of 70% was chosen.
- 650 • **Volume Filter:** After splitting, small artifact segments can occur which can be re-  
651 moved again with a volume filter of  $v > 10 \mu\text{m}^3$ .
- 652 • **Combine Output** The single cells and the split multiple cell are merged to one group  
653 representing the granule cells.
- 654 • **Geometry Filter:** Finally, segments are removed which have an elongated, non-round  
655 shape. They can occur due to the segmentation of blood vessels and other tissue  
656 structures. To discriminate them from the granule cell segments, a bounding box  
657 in the shape of a cuboid is calculated (Arivis function) for each segment. Segments  
658 where the long side of the bounding box being 2.5 times larger than the shortest side  
659 are removed.

660 Note that the limits for the different filters may slightly vary from sample to sample, but  
661 always remain very close to the values specified above. From the segmented granule cells,  
662 the following properties are extracted and stored in .txt-tables: Center of geometry in x, y,  
663 z-position, volume, sphericity, mean value of intensity (gray values), standard deviation of  
664 intensity (gray values).



665 **Appendix 2**

666 **Optimal Transport Analysis**

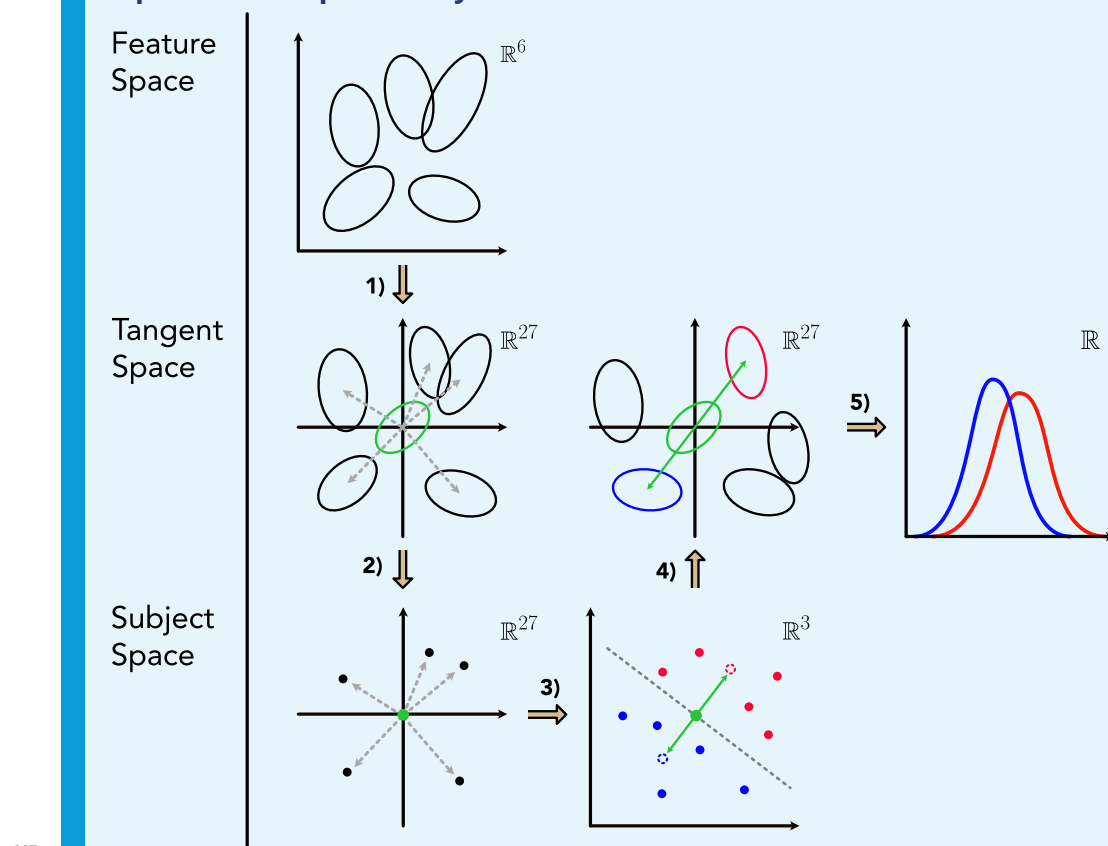

667 **Appendix 2 Figure 1.** The figure schematically illustrates all steps of the optimal transport workflow  
 668 starting from the Gaussian representation of the subjects to the final so-called push forward  
 669 histograms. The individual operations shown in the scheme here are described in detail below.  
 670

672 For the multidimensional analysis with OT, we used the *Linearized Optimal Transport* - frame-  
 673 work *Wang et al. (2013)* which provides several advantages. The key idea is to pick a refer-  
 674 ence sample and calculate the pairwise optimal transport plans and Wasserstein distances  
 675 between the samples and the reference sample instead of calculating them between all  
 676 samples. All other pairwise distances can then be in a simple way approximated from the  
 677 initial  $M$  optimal plans. Hence, one needs to compute for  $M$  samples only  $M$  plans rather  
 678 than  $M(M - 1)/2$  distances. This also implies a linear approximation of the Riemannian  
 679 structure of the Wasserstein space (formally a curved hypersurface), which enables to ap-  
 680 ply standard analysis tools. In the following, it is described by the figure above, how we  
 681 applied the framework to the Gaussian data. The described steps correspond to that in the  
 682 figure.

- **1) Local Linearization:** Consider a point cloud distribution for each individual, obtained by locating all GC nuclei according to their features. In a first step, we approximate the point clouds by Gaussian distribution to strongly reduce the computational effort. This is valid since each single feature is well approximated by a Gaussian distribution. The Gaussians are determined by the empirical mean and covariance matrices of the point clouds. Following the LOT framework, we first compute the Wasserstein barycenter  $\sigma$  which serves as reference point for the local linearization (green ellipse).

687

688

689

690

691

692

693

The barycenter itself is a Gaussian distribution with mean and covariance matrix approximately calculated by the fixed point algorithm [Álvarez-Esteban et al. \(2016\)](#). Starting from the barycenter, each subject can now be projected into the linear tangent space via the Riemannian logarithmic map, in this case given by

694

$$\tilde{\Sigma}_\alpha = (\Sigma_\sigma^{1/2} \Sigma_\alpha \Sigma_\sigma^{1/2})^{1/2} \cdot \Sigma_\sigma^{1/2} - \Sigma_\sigma^{1/2} \quad (10)$$

695

$$\tilde{\mu}_\alpha = \mu_\alpha - \mu_\sigma \quad (11)$$

696

697

698

699

700

701

702

703

704

705

706

707

708

709

710

711

712

713

714

715

716

717

718

719

720

721

722

723

724

725

726

727

728

729

730

731

732

733

734

735

736

737

738

739

740

- **2) Interpretation as Subject Space:** After projecting the samples in the tangent space, we take on a different perspective. For each sample we now consider the combined and flattened entries of  $\tilde{\Sigma}_\alpha$  and  $\tilde{\mu}_\alpha$  as a single vector. Thus, a single point / single vector  $x_n$  with 27 dimensions (21 independent covariance matrix entries, accounting for symmetry, and 6 mean values) is obtained for each subject. This space is denoted as the subject space, in which subjects are represented as single points and not by Gaussians anymore, but information about mean and covariance of the samples are preserved. The pairwise Wasserstein distances between subjects can now be simply approximated by the euclidean norm on the coordinates.

**3) PCA and SVM** To better investigate the high dimensional subject space, we further reduce its dimensionality by a principal component analysis (PCA) and truncation of the number of dimension from 27 to 3. This choice is based on the spectrum of eigenvalues, where the first 3 eigenvalues cover 95% of the variance while the rest does not significantly contribute. Solving the eigenvalue problem and arranging the eigenvectors to a transformation matrix  $\mathbf{T}$ , the projection of the samples  $x_n$  (after centering) to the eigenbasis is carried out according to:

$$x_n' = \mathbf{T}x_n. \quad (12)$$

In this representation, the subjects fall - without any prior information - into two clusters corresponding to the two groups. We perform a simple classification approach by applying a linear support vector machine (SVM, regularization parameter  $C = 5$ ) to the subjects in the reduced 3d PCA-eigenbasis. The SVM returns a hyperplane exactly segregating the subjects according to their groups. The obtained normal vector of the hyperplane is used to calculate the distances of the samples to the plane (see Fig. 5d). Next we investigate how this clear discrepancy between MS- and Control group is reflected in the individual features. To do so, the mean points of both groups are calculated in the 3d subject space, whose difference vector  $\mathbf{N}'$  can be considered as an alternative axis of discrimination (which we expect to be more robust than the axis given by SVM). Moving along this axis to the group means, results in two virtual points representing a typical MS- and a typical Control subject (blue and red dashed circle).

- **4) Back Projection to Gaussian Distributions:** From the points in the 3d PCA - eigenbasis, Gaussian distributions with covariance matrix and mean can now be generated by inverting the above transformations. First, we return from the reduced eigenbasis to the full tangent space  $\mathbb{R}^{27}$  using the inverse of the transformation matrix  $T^{-1}$

741  
742  
743  
744  
745  
746  
747  
748  
749  
750  
751  
752  
753  
754  
755  
756  
757  
758  
759  
760  
761  
762  
763  
764  
765  
766  
767  
768  
769  
770  
771  
772  
773  
774  
775  
776

$$\mathbf{N} = \mathbf{T}^{-1}\mathbf{N}'. \tag{13}$$

Afterwards the vectors in  $\mathbb{R}^{27}$  can be decomposed back to the covariance matrix and mean, according to the inverse order as in the initial transformation. This way a Gaussian distribution is obtained for the typical MS- and Control sample which can be compared (blue and red ellipses). This corresponds to the push-forward of the barycenter under the respective tangent vectors.

- **5) Push forward histograms:** Based on the Gaussians for the typical Control and MS patient, histograms can be generated for each of the six features separately and compared. The resulting histograms, shown in Fig. 5e, reveal the pathological alteration of the granule cells towards a more compact structure in MS.

Note that other axes can also be selected as push forward direction  $\mathbf{N}'$ , such as the normal vector of the SVM hyperplane or the PCA principal axes (see also *Eckermann et al. (2021)*). Further, we evaluated the data also on the level of point clouds. The workflow is completely analogous to the Gaussians with a few exceptions: The reference sample  $\sigma$  is (analogous to the Gaussians) approximated by the fixed-point algorithm but from the resulting  $\mu$  and  $\Sigma$  we sample a point cloud distribution with  $10^4$  particles and uniform weights

$$\sigma = \sum_{k=1}^{N_\sigma} q_k \delta_{z_k}. \tag{14}$$

Local linearization is then performed by solving the transport problem between samples and reference sample with entropic regularization and Sinkhorn's algorithm *Cuturi (2013)*. From the resulting couplings, we calculate mean mass transport from the particles of the barycenter  $z_k$  to each sample. The connections between  $z_k$  and the centers of the averaged transport now become the set of approximated tangent vectors  $\bar{x}_k$ . Thus, we obtain an approximated coupling  $\Pi$  induced by a Monge map. Between two samples  $\eta$  and  $\nu$ , the Wasserstein distance can then be approximated by the  $\mathcal{L}^2$  norm on the set of tangent vectors

$$\mathcal{W}_{\text{lin}}(\sigma; \eta, \nu)^2 = \sum_{k=1}^{N_\sigma} q_k |\bar{x}_k - \bar{y}_k|^2. \tag{15}$$

777 Appendix 3

778

### Supplementary Plots

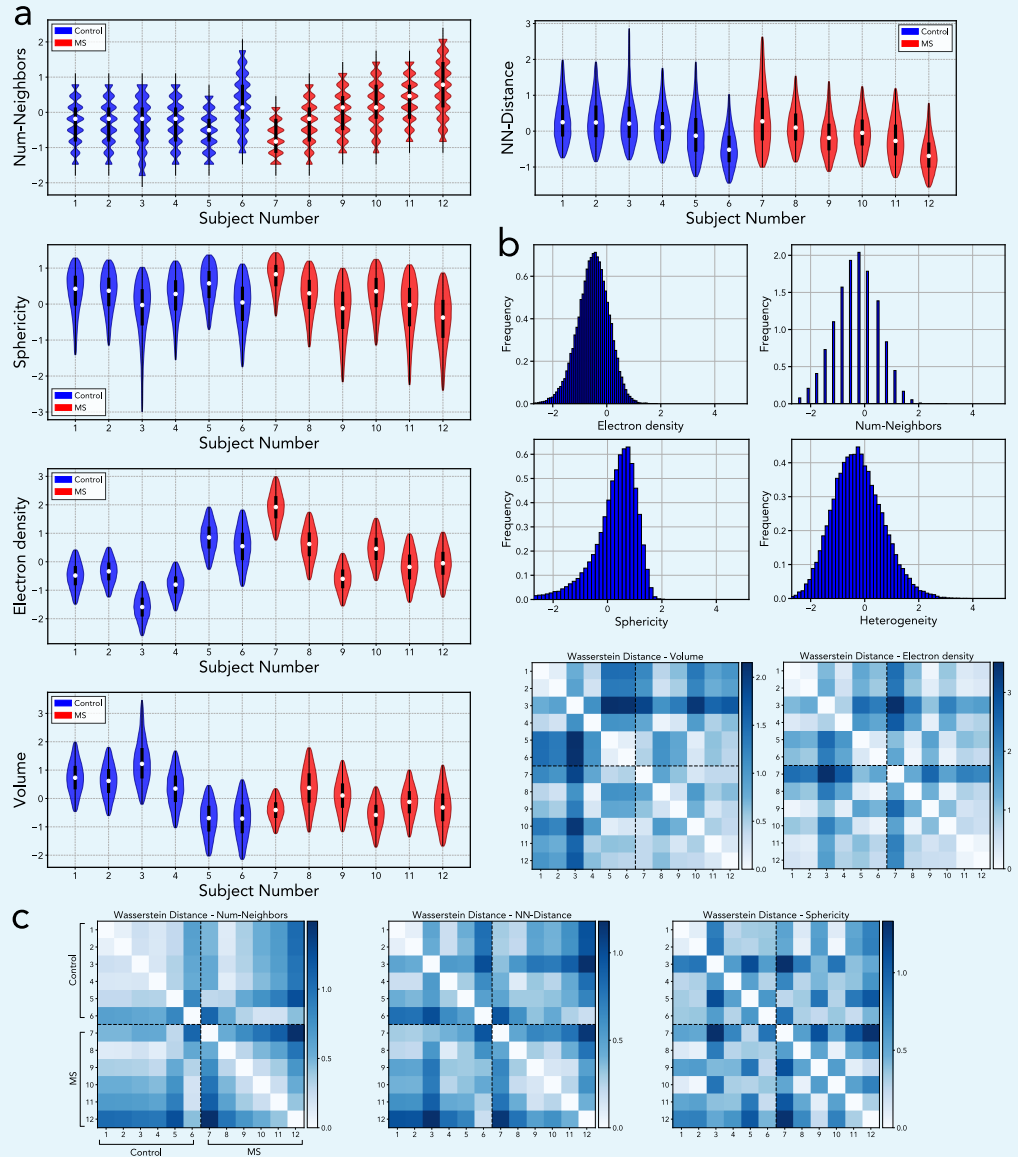

779

780

781

782

783

784

785

786

**Appendix 3 Figure 1.** The figure shows all supplementary plots of the 1d analysis, which were not shown in the main part. **(a)** Violin plots of structural features for each individual. Note that the wavelike structure of the number of neighbors - plot is due to the fact that this feature always takes on integer values. **(b)** Histograms of structural features revealing all features are approximately Gaussian distributed. **(c)** Matrix chart of pairwise Wasserstein-2 distances between 1d feature histograms of all individuals.

787 **Appendix 4**

788

**Supplementary Plots**

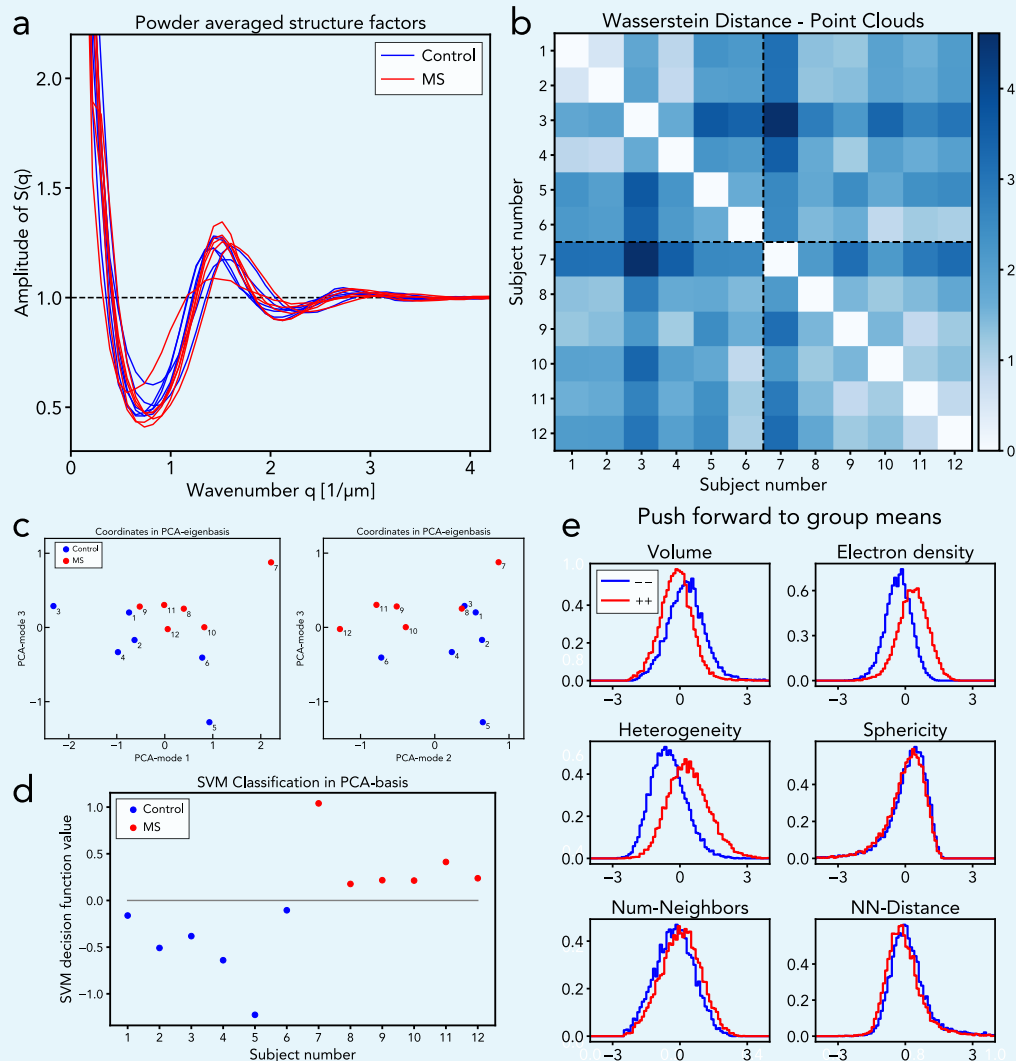

789

790

791

792

793

794

795

796

797

798

799

800

**Appendix 4 Figure 1.** Structure factors and OT- analysis of the point cloud distributions **(a)** Powder averaged structure factors of each subject. By averaging over both group, the structure factors shown in Figure 3a are obtained. **(b-e)** OT analysis of the point cloud distributions with a workflow mostly analogous to the Gaussian distributions. The results for the Wasserstein distance chart **(b)**, the subject space in PCA-eigenbasis **(c)** and the SVM classification **(d)** are very similar to those obtained in the analysis based on the Gaussian approximation. In the push forward of the barycenter **(e)**, one obtains a histogram of a point cloud rather than that of an Gaussian. However, the trends of the individual features, towards compact nuclei in MS, are the same. Overall, the Gaussian distributions can be considered as a valid approximation of the point clouds, giving very similar results at a very low computational cost.
